# Supplementary material for: Newly qualified doctors’ perceived effects of assistantship alignment with first post: a longitudinal questionnaire study
Source: PubMed Central journal article supplement — BMJ Open. 2019 Mar 3;9(3):e023992. doi: 10.1136/bmjopen-2018-023992 (PMC6443063; doi:10.1136/bmjopen-2018-023992), 2019-03-03
Supplement: bmjopen-2018-023992.draft_revisions.pdf [file bmjopen-2018-023992.draft_revisions.pdf]

# BMJ Open

BMJ Open is committed to open peer review. As part of this commitment we make the peer review history of every article we publish publicly available.

When an article is published we post the peer reviewers' comments and the authors' responses online. We also post the versions of the paper that were used during peer review. These are the versions that the peer review comments apply to.

The versions of the paper that follow are the versions that were submitted during the peer review process. They are not the versions of record or the final published versions. They should not be cited or distributed as the published version of this manuscript.

BMJ Open is an open access journal and the full, final, typeset and author-corrected version of record of the manuscript is available on our site with no access controls, subscription charges or pay-per-view fees (<http://bmjopen.bmj.com>).

If you have any questions on BMJ Open's open peer review process please email [editorial.bmjopen@bmj.com](mailto:editorial.bmjopen@bmj.com)

# BMJ Open

## Newly-qualified doctors' perceived efficacy of assistantship alignment with first post: A longitudinal questionnaire study

|                               |                                                                                                                                                                                                                                                                 |
|-------------------------------|-----------------------------------------------------------------------------------------------------------------------------------------------------------------------------------------------------------------------------------------------------------------|
| Journal:                      | <i>BMJ Open</i>                                                                                                                                                                                                                                                 |
| Manuscript ID                 | bmjopen-2018-023992                                                                                                                                                                                                                                             |
| Article Type:                 | Research                                                                                                                                                                                                                                                        |
| Date Submitted by the Author: | 04-May-2018                                                                                                                                                                                                                                                     |
| Complete List of Authors:     | Wells, Stephanie; Cardiff University, School of Medicine<br>Bullock, Alison; Cardiff University, Social Sciences<br>Monrouxe, Lynn V; Taoyuan Chang Gung Memorial Hospital, Chang Gung Medical Education Research Center; CG-MERC, Chang Gung Memorial Hospital |
| Keywords:                     | Workplace learning, Transitions, Students, Medical, Questionnaire, United Kingdom, Education & Training                                                                                                                                                         |
|                               |                                                                                                                                                                                                                                                                 |

SCHOLARONE™  
Manuscripts

Peer Review Only

1  
2  
3 **RUNNING HEAD: Assistantship first-post aligned efficacy**  
4  
5

6 **Newly-qualified doctors' perceived efficacy of assistantship**  
7 **alignment with first post: A longitudinal questionnaire study**  
8  
9

10  
11  
12  
13  
14 Dr Stephanie E Wells,<sup>4</sup> Professor Alison Bullock,<sup>3</sup> Professor Lynn V Monrouxe,<sup>1,2</sup>  
15

- 16  
17  
18 1. School of Medicine, Cardiff University, Cardiff, Wales, UK  
19 2. CUREMeDE, Cardiff University, Cardiff, Wales, UK  
20 3. Chang Gung Medical Education Research Centre (CG-MERC), Linkou, Taiwan (R.O.C.)  
21 4. Chang Gung University, Linkou, Taiwan (R.O.C.)  
22  
23  
24  
25  
26  
27  
28

29 Contact details for corresponding author:  
30

31 Lynn Monrouxe

32 Chang Gung Medical Education Research Centre,

33 Chang Gung Memorial Hospital,

34 Guishan District, Taoyuan City, Taiwan.  
35  
36  
37  
38  
39  
40

41 Telephone: +886975367748  
42

43  
44 Email: [monrouxe@me.com](mailto:monrouxe@me.com)  
45  
46

47 **Word count, excluding title pages, abstract, references, figure and tables: 2,982**  
48  
49  
50  
51  
52  
53  
54  
55  
56  
57  
58  
59  
60

## Keywords

Surveys and questionnaires; Identity, Professional; Workplace learning; Transitions; Doctors; Students, Medical; United Kingdom

## Funding Statement

The study was partly funded by a small research grant from the Association of the Study of Medical Education (ASME) and partly by the School of Medicine, Cardiff University who have been kept informed of progress with the collection, analysis, and interpretation of data but the researchers remained fully independent from the funders.

## Competing Interests Statement

We have read and understood BMJ policy on declaration of interests and declare that we have no competing interests.

## Data Sharing Statement

No additional unpublished data are available outside the research team.

## Author Contribution

LVM and AB contributed to the conception of the study; LVM, AB and SEW designed the work; SEW contributed to the acquisition of the data; SEW and LVM contributed to the analysis of the data and all authors contributed to the interpretation of data; SEW and LVM drafted the manuscript, all authors revised the manuscript critically for important intellectual content; All authors gave their final approval of the version to be published; all authors agree to be accountable for all aspects of the manuscript and will ensure that any questions relating to the accuracy or integrity of any part of the manuscript are appropriately investigated and resolved.

## Acknowledgements

The authors wish to thank the wider research team for their involvement in the study design, helping to secure funding ethics approvals and data collection (Mr Michael Stechman, Dr Tom Yapp, Dr Anton Saayman, Dr Steve Riley, Dr Wyn Harris, Dr Lori Black). In addition, the authors thank Ms Nerys Jones and Ms Hannah Perks for their assistance in testing the questionnaire.

## Ethical Approval

School of Medicine Research Ethics Committee at Cardiff University: SMREC Reference Number: 15/08

## ABSTRACT

### Purpose

Growing evidence supports the role of student assistantships in enhancing graduates' preparedness for practice. However, there is limited evidence concerning the impact of aligning assistantships with graduates' first doctor post. The aims of our study were to determine newly-qualified doctors' views on the value their assistantship experience, effects on anxiety levels, confidence and preparedness for increased responsibilities, exploring change over time and whether effects differ according to assistantship alignment.

### Design

We conducted a longitudinal cross-sectional online questionnaire study examining experiences of aligned and non-aligned assistantships across the transition from medical student to newly-qualified doctor. The questionnaire was distributed to final year medical students within Wales, UK (n=351) and those commencing their first post in Wales, UK (n=150) in June 2015 at Time 1 (T1), and repeated in September 2015 (one month following transition, T2) and January 2016 (T3).

### Results

Response rates at T1 were 50% (n=251, aligned=139, non-aligned=112), T2 36% (n=179, aligned=83, non-aligned=96) and T3 28% (n=141, aligned=69, non-aligned=72): 15% (n=73, aligned=36, non-aligned=37) completed all questionnaires. Paired longitudinal analysis was undertaken where possible. Significant differences were observed between participants on aligned and non-aligned assistantships in terms of the value they place on their assistantship experiences, their anxiety, confidence levels and preparedness for responsibility.

### Conclusion

Although not sustained, aligned assistantships seem to provide graduates with additional benefits during the August transition. Further work is required to establish what it is about the aligned assistantship programme that works and why.

### Strengths and limitations

1. This is the largest study to date to examine the impact of assistantship alignment on aspects of preparedness for practice.
2. The longitudinal nature of the study enables us to examine the impact of the assistantship programme over time, rather than as a snap-shot in time.
3. Although respondents came from a range of UK medical schools, those experiencing an aligned assistantship were all trained and subsequently worked in a single UK country.
4. This study comprises self-reported measures.

## INTRODUCTION

Evidence suggests that medical students' transition into the clinical workplace can have a negative impact on them in terms of their general anxiety and risk of burnout,(1-3) alongside impacting patient care and safety.(4-10) Thus preparedness for practice is an important focus for medical schools and regulators worldwide.(11-15) The challenges of preparing for practice are clear. Tallentire et al. identified how junior and senior doctors alike recognise the difficulties in translating knowledge into practice with juniors expressing that they knew *what* to do but not *how* to do it.(16) Senior doctors attribute this *cognitive gap* to lack of rehearsal. Educational interventions can smooth this gap by increasing graduates' preparedness for *how*, these include student assistantship, shadowing and induction periods.(1, 14) We focus here on student assistantships: "a period during which a student acts as assistant to a junior doctor, with defined duties under appropriate supervision"(14) which has been a compulsory part of the UK undergraduate curricular since 2011-12. This period of *acting up* occurs during students' final year, but how it is implemented differs across UK educational institutions.(17) For example, different schools position it at different times across the curriculum with respect to final exams, at different locations and different durations.(17-23) Often students who staying locally are assigned to assistantships posts in hospitals into which they will later transition,(20) few schools offer *aligned* assistantship placements within the specific team into which they will transition.(18, 19)

At the beginning of their assistantship period students tend to report feeling generally competent with their own clinical skills,(20, 23) reflecting the plethora of previous literature in this area.(1) Unsurprisingly, before-after studies tend to see general improvements in graduates' self-reported confidence (or reduced anxiety) around their skills immediately following their assistantship period.(18, 20, 21, 23) By far the most common, robust finding across all studies is the facilitation of teamwork:(1, 17-23) students are seen as team members, thus facilitating their understanding, confidence and a sense of belonging. Students experiencing assistantships unaligned with their first post (e.g. not on the same ward, or same specialty) feel disadvantaged compared to those whose assistantship is fully aligned.(18, 19)

The opportunity within assistantship placements for students to engage in meaningful learning (taking up opportunities for active patient care involvement, increasing responsibility) is also highlighted across the studies.(19, 21) However, opportunities are not always present or taken up: for example, more missed opportunities can occur in surgical than during medical placements.(21) Despite this, familiarisation with the workplace environment (i.e. wardcraft) is frequently reported.(18, 19, 23)

Research examining both supervisors' and newly-qualified doctors' reports suggests that: supervisors have a more optimistic view than students around graduates' engagement in learning,(21) and there is variation in supervisor experience (e.g. some supervisors are reluctant to allow students undertake routine trainee-doctor procedures).(19, 22) For example, in Jones' study examining the differences between an aligned and non-aligned model, consultants openly admitted to emotionally disinvesting in those not staying in their particular placement (non-aligned model) for their first trainee post as they "will not reap the benefits".(19)

Other research has examined the impact that assistantship alignment, alongside factors such as gender, professional identity and anxiety, has on burnout across medical graduates' transition into practice.(24) Using a longitudinal 1-year cohort study, Monrouxe et al. (2017) administered questionnaires across four time-points from assistantship to 10 months post graduation. They found that self-reported anxiety, professional identity and patient-related

1  
2  
3 burnout remained the same over time, with personal and work-related burnout increasing.  
4 Using linear mixed-effect models, they identified males having significantly lower personal-  
5 burnout but higher patient-related burnout than females, anxiety being significantly  
6 associated with higher burnout and professional identity being significantly related to lower  
7 burnout over time. Furthermore, significantly lower personal and work-related burnout over  
8 time was found for those experiencing an aligned assistantship.(25)  
9

10 However, despite the research around assistantships, there is sparse evidence for the  
11 relative efficacy of assistantship periods and even less around different assistantship  
12 models.(1, 18-23) Much of the research investigating the efficacy of the assistantship period  
13 utilises a before-after questionnaire format,(20, 21, 23, 25) or initial questionnaire with  
14 follow-up interviews,(18) with none of the analyses matching participant data from Time 1  
15 (T1) and Time 2 (T2). Further, questionnaire content is inconsistent across studies with each  
16 programme having a different duration and configuration limiting comparability. Finally, there  
17 is a general tendency for relatively low respondent numbers.(18, 21-23) Taken together this  
18 makes it difficult to draw any strong conclusions regarding the efficacy of the assistantship  
19 period. No one study builds on another.  
20

## 21 **Aims**

22 This study aims to address gaps in the literature by building on our previous work examining  
23 the relative efficacy of assistantship alignment with first post and addresses the following  
24 research questions:  
25

26 RQ1: Do newly-qualified doctors value their assistantship experience?

27  
28 RQ1a: Does this differ according to alignment of assistantship with first post?

29  
30 RQ1b: Does this change over time?

31  
32 RQ2: When transitioning jobs in the first post-graduate year, does aligning assistantships  
33 with first post affect newly-qualified doctors in terms of their:

34 RQ2a: Anxiety levels?

35 RQ2b: Confidence levels?

36 RQ2c: Preparedness for the step-change in responsibilities?

37 RQ2c: Does this change over time?  
38  
39  
40  
41  
42

## 43 **METHODS**

44 A longitudinal cross-sectional online questionnaire design was used to assess newly-  
45 qualified doctors' self-reported efficacy of aligned and non-aligned assistantships across a  
46 single country in the UK.  
47

### 48 **Study setting**

49 The study is set in Wales, UK. The Welsh Deanery (provider of the initial postgraduate  
50 training in Wales) works closely with the two medical schools within the country: a  
51 predominantly school-entry 5-year course (iro 280 graduates annually) and a graduate-entry  
52 medical school (iro 70 graduates annually). Close collaboration between both Schools on  
53 the Senior Student Assistantship (SSA: the final placement in Wales), makes this a  
54 distinctive country context within which to examine the impact of the assistantship variables.  
55 The SSA commences following students' first post allocations with those remaining in Wales  
56  
57

1  
2  
3 matched to their first job. Students leaving Wales are allocated an SSA placement in a role  
4 similar to their first job where possible. In 2015, 52% of graduates from Welsh medical  
5 schools (n=182) undertook an aligned SSA. All placements are designed to allow students to  
6 learn generic skills associated with day-to-day, high quality patient management,  
7 commensurate with the General Medical Council's 'Outcomes for Practice' document (13).  
8 Students' first post on graduation begins on the first Wednesday in August. They continue in  
9 this post for four months until the first week in December when they rotate to their second  
10 postgraduate post.

## 11 **Patient and Public Involvement**

12  
13 No patients or public representatives were involved in either the development of the study or  
14 participating in the study.

## 15 **Procedure**

16  
17 Ethical approval for the study was obtained prior to commencement. Final year students at  
18 the two schools in Wales (n=351) and students commencing their first post in Wales (n=150;  
19 from 27 UK Medical Schools) were invited to complete an online questionnaire at three time  
20 periods: T1 during the SSA in Wales (8th June-6th July 2015), T2 one month after transition  
21 into practice (1st-30th September 2015) and T3 one month after their second post (4th  
22 January-4th February 2016).

23  
24 At T1, a link was sent via email to students in Wales by medical school administrators, and  
25 to other UK graduates outwith Wales by Foundation School administrators. Participants  
26 were invited to provide an email address if they wished to be entered into a prize draw, with  
27 consent this was used to track responses longitudinally. Only SEW had access to these  
28 identifying data. At T2 and T3, participants were invited by SEW directly if they previously  
29 provided an email address. Additionally, the link was circulated by programme  
30 administrators and posted on targeted social media outlets (e.g. year group Facebook  
31 pages). Postgraduate representatives also raised awareness of the questionnaire.

## 32 **Questionnaire development**

33  
34 The T1 questionnaire was developed following discussions with course developers and a  
35 group interview with final-year medical students in Wales undertaking assistantships  
36 (aligned/non-aligned), junior doctors and consultant supervisors.(19) T1 questionnaire  
37 included eight items (Box 1). T2 and T3 questionnaires included two identical questions (Q9  
38 & Q10) as well as two identical questions to T1 (Q1 & Q2). Additionally, T2 and T3  
39 questionnaires included questions to suit the postgraduate context (Qs11-14). All three  
40 questionnaires included modified versions of the Hamilton Anxiety Rating Scale (HAM-  
41 A)(26), the Copenhagen Burnout Inventory (CBI)(27) and Professional Identity, Cognitive  
42 Flexibility and Teamworking Scales,(28) reported elsewhere.(25) The entire questionnaire  
43 comprised 16 screens including an introduction, three demographic/background screens, a  
44 'your story' screen, a 'prize draw' screen and an ending summary screen. Participants could  
45 not move forward without completing each section (apart from the final 'your story' section)  
46 although they could navigate backwards through the questionnaire. Responses to all items  
47 in Box 1 (the focus of this paper) comprised a 5-point Likert scale (strongly disagree=1,  
48 strongly agree=5). IBM SPSS Statistics 20 was used to assist in the analysis. A combination  
49 of descriptive statistics, related-sample t-tests and repeated measures ANOVA was  
50 performed.



## RESULTS

We begin by reporting participants and response rates for the questionnaire at each time point. We then report the item-by-item analyses for individual questions (over time where appropriate).

### Respondents

At T1 we have 251 respondents (50% response rate; aligned=139, non-aligned=112: Table 1). Longitudinal data from three time-points were available from 73 participants (aligned=36, non-aligned=37). Additionally, some participants completed the questionnaire at two time-points: 131 participants at T1 and T2 (aligned=65, non-aligned=66) and 103 participants (aligned 45, non-aligned= 58) at T2 and T3.

### Individual item analysis: longitudinal data

We now consider participants' responses for specific items in the questionnaire, beginning with Qs 1, 2, 9 & 10 as these all have at least two time-points. Only participants who completed all three questionnaires were included in these analyses (n=36 aligned, n=37 non-aligned).

Q1. "My assistantship was a waste of time" (all time points, reversed scored)

There was a significant effect of time,  $F(2,142)=3.15$ ,  $p=.046$ : pairwise comparison showed that the aligned and non-aligned groups agreed with this question significantly more at T2 than T1 ( $p<.02$ ; mean 4.9 vs 4.7 and 4.2 vs 3.9 for aligned and non-aligned participant groups respectively) with no significant differences at T3 (mean 4.7 and 4.1). Those experiencing a non-aligned assistantship agreed more with this statement at all three time-points ( $p<.0001$ : Figure 1).

Q2. "My anxieties about starting work in my [first /second] junior doctor post were greatly relieved by my assistantship" (all time-points)

The Huynh-Feldt correction was used as sphericity is not assumed. There was a significant effect of time,  $F(2,71)=7.18$ ,  $p=.001$  and a significant interaction between time and assistantship alignment,  $F(2,71)=7.17$ ,  $p=.001$ : Pairwise comparisons showed that participants experiencing an aligned assistantship reported agreeing with this question significantly more than those on a non-aligned assistantship at T1 (assistantship period) and T2 (first job:  $p<.03$ ), but by T3 (second job) this difference had disappeared (see Figure 2).

Q9. "My assistantship enhanced my confidence about starting my [second] junior doctor post" (T2 & T3)

There was a significant effect of time,  $F(1,71)=27.0$ ,  $p=.0001$  and interaction between time and assistantship alignment,  $F(1,71)=20.12$ ,  $p=.0001$ : at T2, pairwise comparison showed that participants experiencing an aligned assistantship were significantly more likely to agree that their assistantships had enhanced their confidence about starting in their first post than those experiencing a non-aligned assistantship ( $p<.01$ ; means 4.4 vs 3.5 respectively). However, at T3 the differences between aligned/non-aligned groups had disappeared (means 3.3 vs 3.4 respectively: Figure 3).

1  
2  
3 Q10. "My assistantship prepared me well for the responsibility of my [second] junior  
4 doctor post" (T2 & T3)

5  
6 There was a significant main effect of time,  $F(1,71)=13.3$ ,  $p=.001$ : both groups reported  
7 feeling less prepared for the responsibility of their second than their first post. Pairwise  
8 comparisons were significant for aligned versus non-aligned assistantship groups:  
9 participants experiencing aligned assistantships reported feeling more prepared than those  
10 experiencing non-aligned assistantships ( $p<.004$ ; means: 4.0 vs 3.2, 3.2 vs 2.9 for aligned  
11 and non-aligned groups at T2 and T3 respectively: Figure 4).

### 12 13 **Individual item analysis: single time-point items**

14 We also asked questions specific to the time at which the questionnaire was delivered.  
15 Thus, at T1 these questions related to the specific assistantship placement participants (Qs  
16 3-8, Box 1), at T2 these related to participants' reflections on their assistantship and how  
17 well it prepared them for their junior doctor job (Qs 11-13, Box 1). All participants were  
18 compared at each time point ( $n= 139$  and  $n=112$  at T1,  $n=83$  and  $n=96$  at T2 for aligned and  
19 non-aligned respectively: Table 2). Of the nine questions analysed, all but one (Q12) were  
20 significantly different between aligned and non-aligned participant groups: neither group felt  
21 that they could have made more of their assistantship experience. Of the eight that were  
22 significantly different by alignment group, the aligned group rated items significantly higher  
23 than the non-aligned group for seven of these: assistantship is a valuable time for learning  
24 from mistakes (Q3), their consultant in their team does not understand the purpose of the  
25 Assistantship programme (Q4), being given greater responsibility (Q5), learning about the  
26 workplace (Q6), understanding the junior doctor role better (Q7), managing critically ill  
27 patients (Q8) and appreciating the value of the assistantship (Q11). However, when  
28 considering preparedness for their second junior doctor post (Q13), those who had  
29 experienced a non-aligned assistantship agreed with this more than the aligned  
30 assistantship group.  
31  
32  
33

## 34 35 **DISCUSSION**

36 Our study adds to the evidence from questionnaire studies concerning the efficacy of  
37 assistantships as transition interventions.(20, 23, 25) We examined the relative value of  
38 aligning assistantship placements with students' first post as newly-qualified doctors across  
39 three time points: during the assistantship placement, one month into their first post and one  
40 month into their second post. Participants responded positively to statements concerning the  
41 impact of their aligned and non-aligned assistantship on their preparedness for practice  
42 across a range of domains. Participants who experienced an aligned assistantship at T1  
43 were consistently more likely to attribute enhanced preparedness for their first junior doctor  
44 role (T2) to their assistantship experiences. Although participants who experienced an  
45 aligned assistantship felt this to be of greater value than those who did not at all time points,  
46 the effects of anxiety relief and enhanced confidence for the aligned group was diminished  
47 at T3. This finding accords with previous research suggesting that an extended shadowing  
48 placement – akin to the aligned assistantship model described here – has the potential to  
49 reduce anxiety associated with the August transition.(29) The statistically significant  
50 differences observed between aligned and non-aligned groups' responses to anxiety-related  
51 questions within our data corroborate this idea, but also show the limits of this benefit. It is  
52 important to note that what we are considering here is the issue of context-specific anxiety.  
53 This differs from generalised anxiety as measured by, for example, the Hamilton Anxiety  
54 Scale,(26) which has been shown to be a predictor of burnout over this transition period.(25)  
55 Interestingly, in these data at T3, participants who had experienced a non-aligned  
56  
57  
58

1  
2  
3 assistantship believed that their assistantship had prepared them well for their second post  
4 significantly more than those who had experienced an aligned assistantship. However, this  
5 item received the lowest means across all statements for both groups.

6  
7 Taken together, these results suggest the importance of assistantships in general as a  
8 mechanism for supporting the transition of medical graduates into practice, but more  
9 importantly of the added value of aligned assistantships during this time. However, our  
10 results also demonstrate that this added value washes out over time: by the time participants  
11 reach their second transition a few months later, there appears to be little advantage to  
12 having undertaken an aligned assistantship. Indeed, our data suggest that at the point of  
13 rotating to their second post, non-aligned assistantships might convey some advantage as  
14 they have undertaken this transition before: having started their first junior doctor post  
15 without any elongated shadowing period. Ultimately, it appears that, rather than eliminating  
16 anxiety and lack of confidence around the transition into their junior doctor role, the aligned  
17 assistantships merely defers this until a later point. This does not necessarily mean that  
18 alignment is unhelpful; rather it means that this is not the end of the story and further  
19 interventions are required over time.  
20

21 This study has a number of strengths and limitations. In terms of strengths, to our  
22 knowledge, this is the first study that has specifically examined the longitudinal impact of  
23 assistantships by analysing matched data, in addition to unpacking the differences between  
24 aligned and non-aligned models of assistantships. Thus, our data permit paired longitudinal  
25 analysis that has served to enhance our understanding of individuals' perception of  
26 assistantship utility and emotional responses to changes in their role at different transition  
27 points during the first junior doctor year. Our data include the views of graduates from 27  
28 different UK medical schools.  
29

30 Whilst our study allowed for comparisons between students who undertook aligned and non-  
31 aligned assistantships, we recognise limitations, including that the aligned participant cohort  
32 is heterogeneous in its composition in that they all come from one of two medical schools  
33 within a single country. The study is also limited by attrition in response rates over time:  
34 reducing from n=252 (50% response rate) at Time 1 to n=141 (28% response rate) at Time  
35 3, with n=73 responding across all three time-points. A number of factors may have  
36 contributed to this. At Times 2 and 3 our ability to contact graduates of Welsh medical  
37 schools undertaking their junior doctor training elsewhere in the UK was not possible unless  
38 participants had provided an email address in a previous questionnaire phase. This problem  
39 was compounded at Time 3; in January, a number of institutional email addresses provided  
40 by participants at Times 1 and 2 had expired if individuals left their institutions. The study is  
41 also subject to responder bias and it is possible that individuals with positive experiences of  
42 aligned assistantships and individuals with negative experiences of non-aligned  
43 assistantships represented the groups most likely to participate.  
44  
45

46 Despite these limitations, our study suggests that consideration needs to be given to  
47 strategies that support junior doctors as they rotate to their second post. There may be value  
48 in considering the model of practice used within the Broad-Based Training programme which  
49 enables trainees to spend 10% of their time in a forthcoming specialty.<sup>(30)</sup> Finally, although  
50 we have found that undertaking an aligned assistantship has positive outcomes, we have yet  
51 to fully understand the specific mechanism through which these outcomes are achieved, and  
52 for whom they are most beneficial. Future research would benefit from a realist approach to  
53 unpack these issues further to inform programme development. In addition, further research  
54 should seek to explore how graduates' experience during their own assistantship influences  
55  
56  
57  
58  
59  
60

1  
2  
3 their behaviour as assistantship supervisors towards the end of their first year as a newly  
4 qualified doctor.  
5  
6  
7  
8  
9  
10  
11  
12  
13  
14  
15  
16  
17  
18  
19  
20  
21  
22  
23  
24  
25  
26  
27  
28  
29  
30  
31  
32  
33  
34  
35  
36  
37  
38  
39  
40  
41  
42  
43  
44  
45  
46  
47  
48  
49  
50  
51  
52  
53  
54  
55  
56  
57  
58  
59  
60

For peer review only

1  
2  
3  
4  
5  
6  
7  
8  
9  
10  
11  
12  
13  
14  
15  
16  
17  
18  
19  
20  
21  
22  
23  
24  
25  
26  
27  
28  
29  
30  
31  
32  
33  
34  
35  
36  
37  
38  
39  
40  
41  
42  
43  
44  
45  
46  
47  
48  
49  
50  
51  
52  
53  
54  
55  
56  
57  
58  
59  
60

# FIGURES

**FIGURE 1: MAIN EFFECT OF VALUE OF ASSISTANTSHIP EXPERIENCE (Q1)**

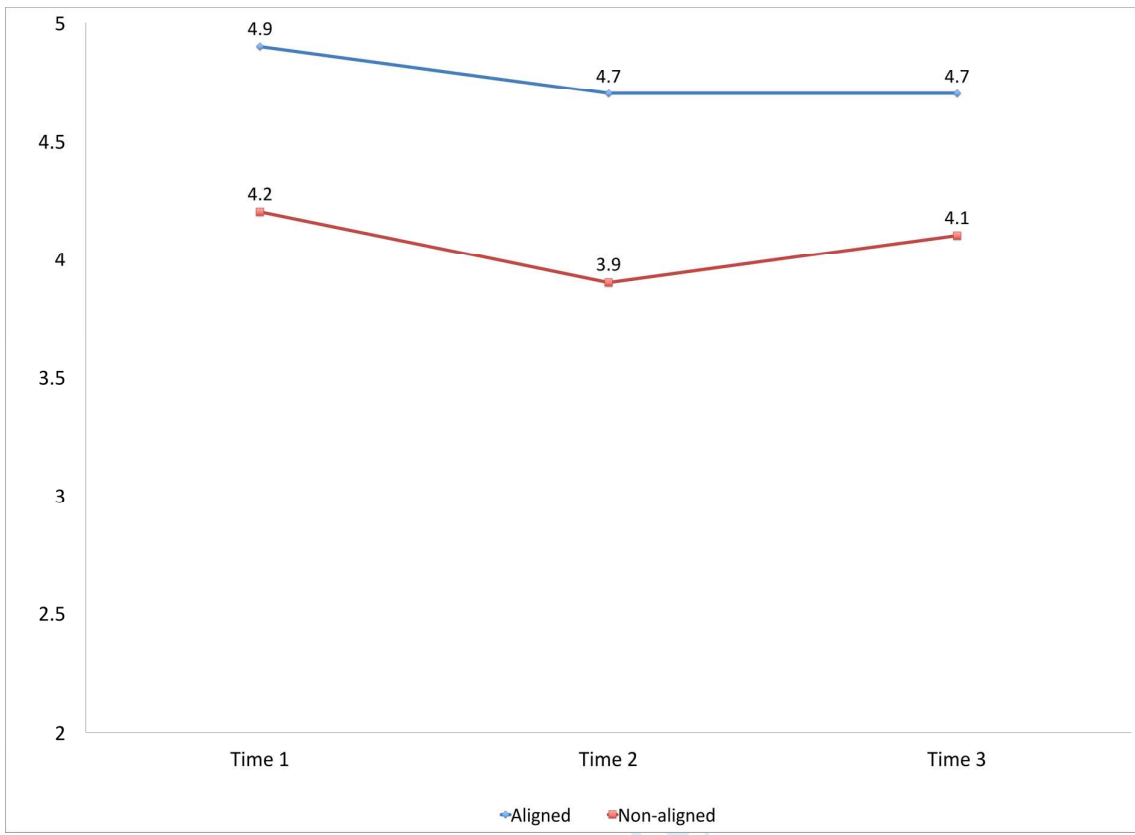

**FIGURE 2: INTERACTION BETWEEN ASSISTANTSHIP EXPERIENCE AND ANXIETY RELIEF OVER TIME (Q2)**

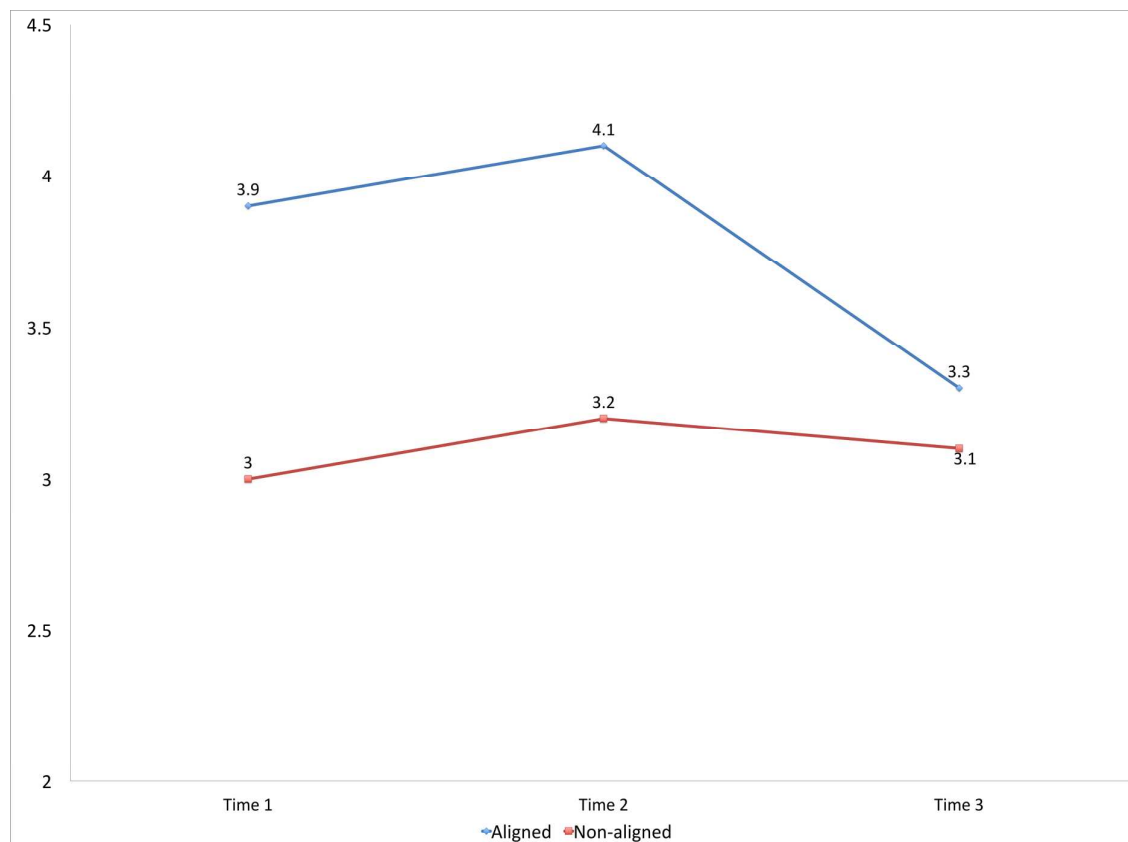

1  
2  
3  
4  
5  
6  
7  
8  
9  
10  
11  
12  
13  
14  
15  
16  
17  
18  
19  
20  
21  
22  
23  
24  
25  
26  
27  
28  
29  
30  
31  
32  
33  
34  
35  
36  
37  
38  
39  
40  
41  
42  
43  
44  
45  
46  
47  
48  
49  
50  
51  
52  
53  
54  
55  
56  
57  
58  
59  
60

**FIGURE 3: INTERACTION BETWEEN ASSISTANTSHIP EXPERIENCE AND CONFIDENCE OVER TIME (Q9)**

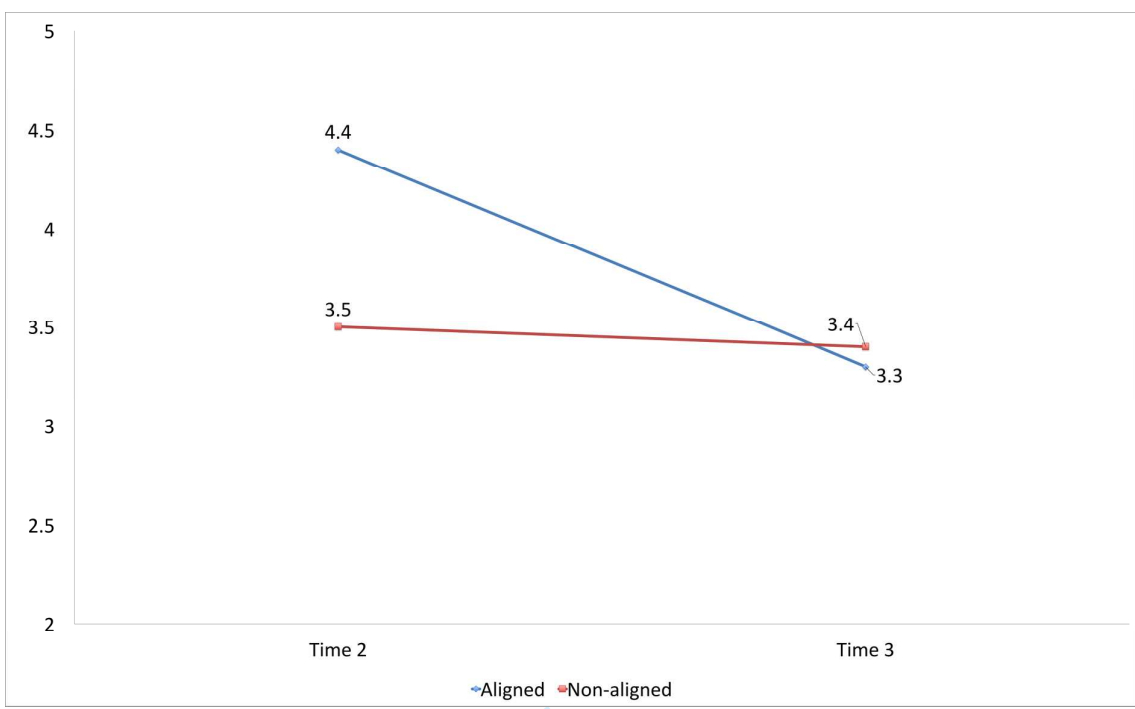

review only

**FIGURE 4: MAIN EFFECT OF PREPAREDNESS FOR RESPONSIBILITY AND ASSISTANTSHIP EXPERIENCE (Q10)**

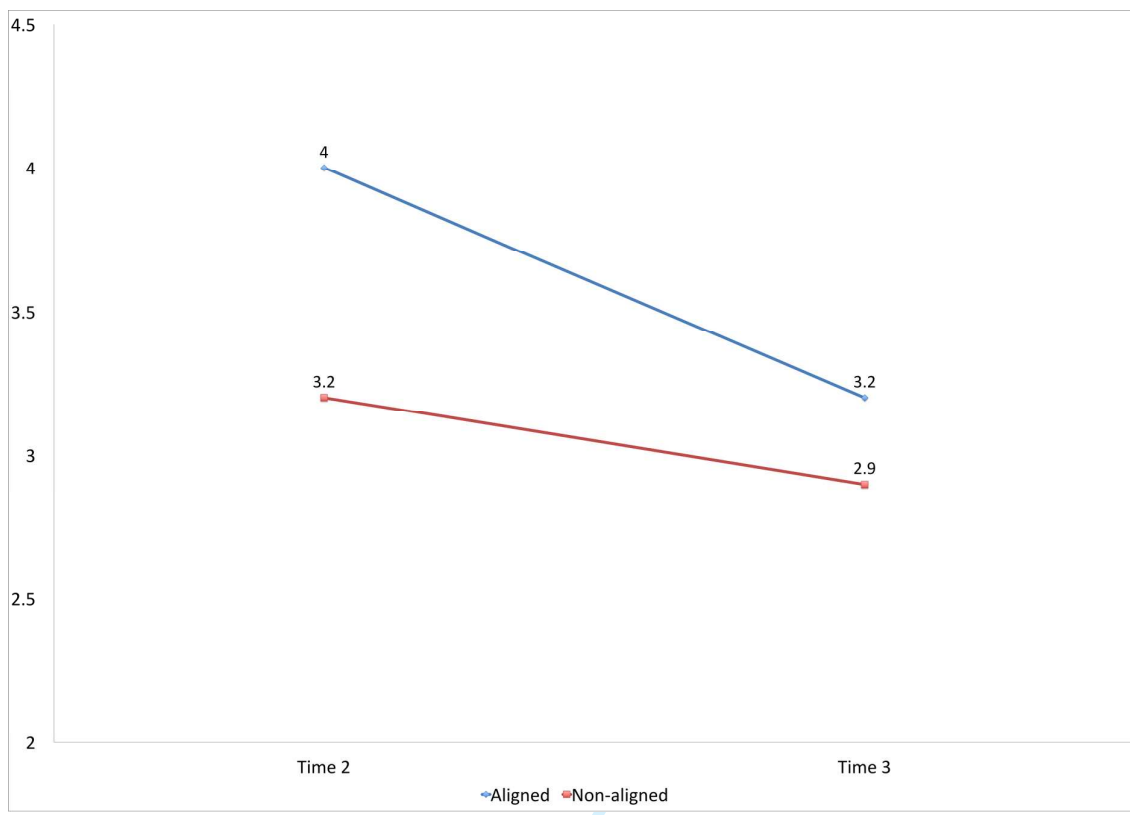



**BOX 1: QUESTIONNAIRE ITEMS T1-T3****T1 Questionnaire**

Q1. My assistantship has been a waste of time†

Q2. My anxieties about starting work in my first junior doctor post are greatly relieved.

Q3. This has been a valuable time for me to learn from mistakes now, before I have more responsibility

Q4. The consultant in my team understands the purpose of the Assistantship programme†

Q5. I have been given more responsibility than ever before

Q6. I have received little in the way of 'learning about the workplace'†

Q7. I understand the job of a junior doctor better now

Q8. I have had no valuable experience in managing critically ill patients (for example, attending cardiac arrest calls)†

**T2 Questionnaire**

Q1. My assistantship was a waste of time†

Q2. My anxieties about starting work in my first junior doctor post were greatly relieved by my Assistantship

Q9. My assistantship enhanced my confidence about starting as a junior doctor

Q10. My assistantship prepared me well for the responsibility of being a junior doctor

Q11. Starting my junior doctor job has made me appreciate the value of my assistantship more

Q12. On reflection, I think I could have made more of my assistantship experience

Q13. My assistantship has prepared me well for the junior doctor post I will move to next

**T3 Questionnaire**

Q1. My assistantship was a waste of time†

Q2. My anxieties about starting work in my second junior doctor post were greatly relieved by my assistantship

Q9. My assistantship enhanced my confidence about starting my second junior doctor post

Q10. My assistantship prepared me well for the responsibility of my second junior doctor post

NOTE: †These questions were reversed scored.

**TABLE 1: PARTICIPANTS BY ALIGNMENT**

| Questionnaire Phase      |                 | Participants |             |       | Response Rate (%) |
|--------------------------|-----------------|--------------|-------------|-------|-------------------|
|                          |                 | Aligned      | Non-aligned | Total |                   |
| All Questionnaire Data   | T1              | 139          | 112         | 251   | 50                |
|                          | T2              | 83           | 96          | 179   | 36                |
|                          | T3              | 69           | 72          | 141   | 28                |
| Paired Longitudinal Data | T1 and T2       | 65           | 66          | 131   | 26                |
|                          | T2 and T3       | 45           | 58          | 103   | 21                |
|                          | All time points | 36           | 37          | 73    | 15                |

TABLE 2: INDIVIDUAL ITEM ANALYSES AT TIMES 1 AND 2

| Statement                                                                                                                | Alignment   | n   | Mean | Std. Dev | Std Error Mean | t      | df  | Sig    |
|--------------------------------------------------------------------------------------------------------------------------|-------------|-----|------|----------|----------------|--------|-----|--------|
| TIME 1                                                                                                                   |             |     |      |          |                |        |     |        |
| Q3. This has been a valuable time for me to learn from mistakes now, before I have more responsibility                   | Aligned     | 139 | 4.37 | 0.684    | 0.058          | 4.614  | 249 | 0.0001 |
|                                                                                                                          | Non-aligned | 112 | 3.93 | 0.846    | 0.846          |        |     |        |
| Q4. The consultant in my team does not understand the purpose of the Assistantship programme†                            | Aligned     | 139 | 4.01 | 0.925    | 0.078          | 2.570* | 233 | 0.011  |
|                                                                                                                          | Non-aligned | 112 | 3.71 | 0.965    | 0.091          |        |     |        |
| Q5. I have been given more responsibility than ever before                                                               | Aligned     | 139 | 3.93 | 1.047    | 0.089          | 3.343* | 214 | 0.001  |
|                                                                                                                          | Non-aligned | 112 | 3.43 | 1.271    | 0.120          |        |     |        |
| Q6. I have received little in the way of 'learning about the workplace'†                                                 | Aligned     | 139 | 4.10 | 0.927    | 0.079          | 2.952  | 249 | 0.003  |
|                                                                                                                          | Non-aligned | 112 | 3.76 | 0.893    | 0.084          |        |     |        |
| Q7. I understand the job of a junior doctor better now                                                                   | Aligned     | 139 | 4.14 | 0.782    | 0.066          | 3.975* | 211 | 0.0001 |
|                                                                                                                          | Non-aligned | 112 | 3.69 | 0.968    | 0.091          |        |     |        |
| Q8. I have had no valuable experience in managing critically ill patients (for example, attending cardiac arrest calls)† | Aligned     | 139 | 3.35 | 1.027    | 0.087          | 2.608* | 220 | 0.010  |
|                                                                                                                          | Non-aligned | 112 | 2.97 | 1.197    | 0.113          |        |     |        |
| TIME 2                                                                                                                   |             |     |      |          |                |        |     |        |

|                                                                                              |             |    |      |       |       |        |     |        |
|----------------------------------------------------------------------------------------------|-------------|----|------|-------|-------|--------|-----|--------|
| Q11. Starting my junior doctor job has made me appreciate the value of my assistantship more | Aligned     | 83 | 4.28 | 0.668 | 0.733 | 7.644* | 162 | 0.0001 |
|                                                                                              | Non-aligned | 96 | 3.27 | 1.071 | 0.109 |        |     |        |
| Q12. On reflection, I think I could have made more of my assistantship experience            | Aligned     | 83 | 2.80 | 1.124 | 0.123 | -0.559 | 177 | 0.577  |
|                                                                                              | Non-aligned | 96 | 2.89 | 1.035 | 0.106 |        |     |        |
| Q13. My assistantship has prepared me well for the junior doctor post I will move to next    | Aligned     | 83 | 2.46 | 0.991 | 0.109 | -2.997 | 177 | 0.003  |
|                                                                                              | Non-aligned | 96 | 2.93 | 1.088 | 0.111 |        |     |        |

NOTE: †Questions marked were reverse scored; \*Equal variances not assumed.

## REFERENCES

1. Monrouxe L, Bullock A, Cole J, Gormley G, Kaufhold K, Kelly N, et al. How Prepared are UK Medical Graduates for Practice? Final report from a programme of research commissioned by the General Medical Council: GMC; 2014 [<https://www.gmc-uk.org/-/media/about/how-prepared-are-uk-medical-graduates-for-practice.pdf?la=en&hash=1797AFD84B58E269D4FAB5E107A99EE93509ED12>; Accessed 17th May 2018]
2. Markwell AL, Wainer Z. The health and wellbeing of junior doctors: insights from a national survey. *Medical Journal of Australia*. 2009;191(8):441-4.
3. O'Donnell M, Noad R, Boohan M, Carragher A. Foundation programme impact on junior doctor personality and anxiety in Northern Ireland. *The Ulster Medical Journal*. 2012;81(1):19-25.
4. Vaughan L, McAlister G, Bell D. 'August is always a nightmare': results of the Royal College of Physicians of Edinburgh and Society of Acute Medicine August transition survey. *Clinical medicine (London, England)*. 2011;11(4):322-6.
5. Young JQ, Ranji SR, Wachter RM, Lee CM, Niehaus B, Auerbach AD. "July Effect": Impact of the Academic Year-End Changeover on Patient Outcomes. *Annals of Internal Medicine*. 2011;155(5):309-15.
6. Inaba K, Recinos G, Teixeira PG, Barmparas G, Talving P, Salim A, et al. Complications and death at the start of the new academic year: is there a July phenomenon? *The Journal of trauma*. 2010;68(1):19-22.
7. Phillips DP, Barker GE. A July spike in fatal medication errors: a possible effect of new medical residents. *Journal of general internal medicine*. 2010;25(8):774-9.
8. Yaghoubian A, de Virgilio C, Chiu V, Lee SL. "July effect" and appendicitis. *Journal of surgical education*. 2010;67(3):157-60.
9. Massey N. Black Wednesday' expected to see rise in hospital patient deaths as junior doctors start work. *The Mirror*. 2014.
10. Alexander C, Millar J, Szmids N, Hanlon K, Cleland J. Can new doctors be prepared for practice? A review. *Clin Teach*. 2014;11(3):188-92.
11. Langdale LA, Schaad D, Wipf J, Marshall S, Vontver L, Scott CS. Preparing graduates for the first year of residency: are medical schools meeting the need? *Academic medicine : journal of the Association of American Medical Colleges*. 2003;78(1):39-44.
12. Tokuda Y, Goto E, Otaki J, Jacobs J, Omata F, Obara H, et al. Undergraduate educational environment, perceived preparedness for postgraduate clinical training, and pass rate on the National Medical Licensure Examination in Japan. *BMC medical education*. 2010;10:35.
13. General Medical Council. *Tomorrow's Doctors: Outcomes and standards for undergraduate medical education*. London: General Medical Council; 2009.
14. GMC. *Clinical placements for medical students: Advice supplementary to Tomorrow's Doctors (2009)*. London: General Medical Council; 2011.
15. GMC. *Promoting excellence: standards for medical education and training* [http://www.gmc-uk.org/Promoting\\_excellence\\_standards\\_for\\_medical\\_education\\_and\\_training\\_0715.pdf\\_61939165.pdf](http://www.gmc-uk.org/Promoting_excellence_standards_for_medical_education_and_training_0715.pdf_61939165.pdf); General Medical Council; 2015 [
16. Tallentire VR, Smith SE, Skinner J, Cameron HS. Understanding the behaviour of newly qualified doctors in acute care contexts. *Med Educ*. 2011;45(10):995-1005.
17. Crossley JG, Vivekananda-Schmidt P. Student assistantships: bridging the gap between student and doctor. *Journal of Advances in Medical Education and Practice*. 2015;6:447-57.
18. Lightman E, Kingdon S, Nelson M. A prolonged assistantship for final-year students. *The Clinical Teacher*. 2015;12(2):115-20.
19. Jones, O. M., Okeke, C., Bullock, A., Wells, S. E. & Monrouxe, L. V. 'He's going to be a doctor in August': a narrative interview study of medical students' and their educators'

1  
2  
3 experiences of aligned and misaligned assistantships. *BMJ Open*,  
4 2016;6:e011817. doi: 10.1136/bmjopen-2016-011817

5 20. Braniff C, Spence RA, Stevenson M, Boohan M, Watson P. Assistantship improves  
6 medical students' perception of their preparedness for starting work. *Medical Teacher*.  
7 2016;38(1):51-8.

8 21. Burford B, Ellis E, Williamson A, Forest I, Vance G. Learning opportunities in 'student  
9 assistantships'. *The Clinical Teacher*. 2015;12(2):121-7.

10 22. Fullbrook A, Ross M, Mellanby E, Wylde K, Jaap A, Cameron H. Initial experiences  
11 of a student assistantship. *The Clinical Teacher*. 2015.

12 23. Hawkins A, Stanton A, Forbes K. An extended assistantship for final-year students.  
13 *The Clinical Teacher*. 2015.

14 24. Monrouxe, L. V., Bullock, A., Tseng, H. & Wells, S. E. Association of professional  
15 identity, gender, team understanding, anxiety and workplace learning alignment with burnout  
16 in junior doctors: a longitudinal cohort study. *BMJ Open*, 2017;7:e017942. doi:  
17 10.1136/bmjopen-2017-017942

18  
19 25. Monrouxe, L. V., Grundy, L., Mann, M., John, Z., Panagoulas, E., Bullock, A. &  
20 Mattick, K. How prepared are UK medical graduates for practice? A rapid review of the  
21 literature 2009–2014. *BMJ Open*, 2017; 7:e013656. doi: 10.1136/bmjopen-2016-013656

22 26. Hamilton M. The assessment of anxiety states by rating. *British Journal of Medical*  
23 *Psychology*. 1959;32:50-5.

24 27. Kristensen TS, Borritz M, Villadsen E, Christensen KB. The Copenhagen Burnout  
25 Inventory: A new tool for the assessment of burnout, . *Work & Stress: An International*  
26 *Journal of Work, Health & Organisations*. 2005;19(3):192-207.

27 28. Adams K, Hean S, Sturgess P, Macleod Clark J. Investigating the factors influencing  
28 professional identity of first-year health and social care students. *Learning in Health and*  
29 *Social Care*. 2006;5(2):55-68.

30 29. Van Hamel C, Jenner LE. Prepared for practice? A national survey of UK foundation  
31 doctors and their supervisors. *Med Teach*. 2015;37(2):181-8.

32 30. Muddiman E, Bullock AD, MacDonald J, Allery L, Webb KL, Pugsley L. 'It's surprising  
33 how differently they treat you': a qualitative analysis of trainee reflections on a new  
34 programme for generalist doctors. *BMJ Open*. 2016;6(9).  
35  
36  
37  
38  
39  
40  
41  
42  
43  
44  
45  
46  
47  
48  
49  
50  
51  
52  
53  
54  
55  
56  
57  
58  
59  
60

## Checklist for Reporting Results of Internet E-Surveys (CHERRIES)

|                                                    |                        |                                                                                                                                                                                                                                                                                                                                                                                                                             |
|----------------------------------------------------|------------------------|-----------------------------------------------------------------------------------------------------------------------------------------------------------------------------------------------------------------------------------------------------------------------------------------------------------------------------------------------------------------------------------------------------------------------------|
|                                                    | Date/Time              | Procedure, p6.                                                                                                                                                                                                                                                                                                                                                                                                              |
|                                                    | Randomization of items | None                                                                                                                                                                                                                                                                                                                                                                                                                        |
|                                                    | Adaptive questioning   | None                                                                                                                                                                                                                                                                                                                                                                                                                        |
|                                                    | Number of screens      | 16, see p6.                                                                                                                                                                                                                                                                                                                                                                                                                 |
|                                                    | Completeness check     | Participants could not move forward without completing sections (apart from the final 'your story' section). P6.                                                                                                                                                                                                                                                                                                            |
|                                                    | Review check           | Yes, participants could move backwards. P6.                                                                                                                                                                                                                                                                                                                                                                                 |
| Response rates                                     | Unique site visitor    | Via email address which enabled us to link data longitudinally. P6.                                                                                                                                                                                                                                                                                                                                                         |
|                                                    | View rates             | None recorded                                                                                                                                                                                                                                                                                                                                                                                                               |
|                                                    | Participation rate     | "At T1 we have 251 respondents (50% response rate; aligned=139, non-aligned=112: Table 1). Longitudinal data from three time-points were available from 73 participants (aligned=36, non-aligned=37). Additionally, some participants completed the questionnaire at two time-points: 131 participants at T1 and T2 (aligned=65, non-aligned=66) and 103 participants (aligned 45, non-aligned= 58) at T2 and T3."<br>P6-7. |
|                                                    | Completion rate        | Attrition was not recorded                                                                                                                                                                                                                                                                                                                                                                                                  |
| Preventing multiple entries from single individual | Cookies used           | Respondent anonymity and Bristol Online Survey (BOS). BOS is designed to protect respondent anonymity. BOS does not use cookies for survey completion and external tracking software such as Google Analytics is not supported on BOS surveys. Additionally, we cannot access any information about respondents' IP addresses.                                                                                              |
| Design                                             | Describe survey design | p6.                                                                                                                                                                                                                                                                                                                                                                                                                         |
| IRB review                                         | IRB approval           | Yes, detailed                                                                                                                                                                                                                                                                                                                                                                                                               |
|                                                    | Informed consent       | Yes, including additional 1 page information on the survey itself.                                                                                                                                                                                                                                                                                                                                                          |
|                                                    | Data protection        | BOS Security<br>Physical security<br><br>All data is stored on servers located at the University of Bristol, United Kingdom.<br><br>Administrative security<br><br>Access to sensitive data via BOS is strictly                                                                                                                                                                                                             |

|  |  |                                                                                                                                                                                                                                                                                                                                                                                                                                                                                                                                                                                                                                                                                                                                                                                                                                                                                                                                                                                                                                                                                                                                                                                                                                                                                                                                                                                                                                                                                                                                                                                                                                                                   |
|--|--|-------------------------------------------------------------------------------------------------------------------------------------------------------------------------------------------------------------------------------------------------------------------------------------------------------------------------------------------------------------------------------------------------------------------------------------------------------------------------------------------------------------------------------------------------------------------------------------------------------------------------------------------------------------------------------------------------------------------------------------------------------------------------------------------------------------------------------------------------------------------------------------------------------------------------------------------------------------------------------------------------------------------------------------------------------------------------------------------------------------------------------------------------------------------------------------------------------------------------------------------------------------------------------------------------------------------------------------------------------------------------------------------------------------------------------------------------------------------------------------------------------------------------------------------------------------------------------------------------------------------------------------------------------------------|
|  |  | <p>limited to BOS's support and technical teams. This access is only permitted when it is at the request of the client concerned or necessary for the investigation of operational issues (or when required by law).</p> <p>The BOS servers and backups are accessible only by members of the BOS technical team and other authorised members of IT Services within the University of Bristol (such as systems administrators or those responsible for maintaining the backup service).</p> <p>User authentication</p> <p>New users choose their own passwords and will need to enter a username and password each time they log in. BOS issues a cookie to store session information when registered users log in. The session cookie does not include user information and is not retained once the browser is closed.</p> <p>No cookies are used when survey respondents complete surveys.</p> <p>BOS employees</p> <p>All new staff at the University of Bristol, including casual staff, are given a contract of employment containing a confidentiality clause and are made aware of their responsibilities toward restricted university data and personal data as part of their induction process. All University of Bristol IT staff are provided with data security training.</p> <p>Encryption</p> <p>All survey responses are collected over encrypted SSL (TLS) connections. SSL is the standard technology for establishing an encrypted link between a web server and a browser. It ensures that sensitive information can be transmitted securely. All communications within onlinesurveys.ac.uk are also sent over SSL encrypted connections.</p> |
|--|--|-------------------------------------------------------------------------------------------------------------------------------------------------------------------------------------------------------------------------------------------------------------------------------------------------------------------------------------------------------------------------------------------------------------------------------------------------------------------------------------------------------------------------------------------------------------------------------------------------------------------------------------------------------------------------------------------------------------------------------------------------------------------------------------------------------------------------------------------------------------------------------------------------------------------------------------------------------------------------------------------------------------------------------------------------------------------------------------------------------------------------------------------------------------------------------------------------------------------------------------------------------------------------------------------------------------------------------------------------------------------------------------------------------------------------------------------------------------------------------------------------------------------------------------------------------------------------------------------------------------------------------------------------------------------|



|                         |  |                                                                                                                                                                                                                                                                                                                                                                                                                                                                                                                                                                                                                                                                                                                                                                                                                                                                                                                                                                                                                                                                                                                                                                                                                                                                                                                                                                                                                                                                                                                                                             |
|-------------------------|--|-------------------------------------------------------------------------------------------------------------------------------------------------------------------------------------------------------------------------------------------------------------------------------------------------------------------------------------------------------------------------------------------------------------------------------------------------------------------------------------------------------------------------------------------------------------------------------------------------------------------------------------------------------------------------------------------------------------------------------------------------------------------------------------------------------------------------------------------------------------------------------------------------------------------------------------------------------------------------------------------------------------------------------------------------------------------------------------------------------------------------------------------------------------------------------------------------------------------------------------------------------------------------------------------------------------------------------------------------------------------------------------------------------------------------------------------------------------------------------------------------------------------------------------------------------------|
|                         |  | <p>BOS user passwords are encrypted using PBKDF2 with a SHA256 hash and a random salt.</p> <p>Backups</p> <p>BOS's data stores are backed up daily.</p> <p>University of Bristol has a data retention policy that means that backups are only held for three months. Backups are stored securely in a separate location from the data centres, but still on the University of Bristol's campus. After three months the tapes are either recycled or destroyed. BOS enables users to export survey response data in a number of popular formats (see FAQ for details) so that it can be backed up or used with other software.</p> <p>User responsibilities</p> <p>Users must not share accounts – by this we mean that each person who has access to a BOS account must use a unique username and password. You must not allow other people to use your username and password and multiple users must not log in using a single set of shared credentials (such as a 'group account').</p> <p>Users' passwords should be sufficiently complicated, stored securely (if stored at all) and not be the same as used on any other system.</p> <p>You should ensure that you have appropriate levels of security on your own systems should you choose to export sensitive data.</p> <p>You and/or your institution are the Data Controller for any information collected using surveys run through BOS. If you are not sure of the implications of being a Data Controller please consult the data protection officer (or equivalent) at your institution.</p> |
| Development and testing |  | Questionnaire was tested by undergraduate volunteers prior to the launch (see Acknowledgements) and p6.                                                                                                                                                                                                                                                                                                                                                                                                                                                                                                                                                                                                                                                                                                                                                                                                                                                                                                                                                                                                                                                                                                                                                                                                                                                                                                                                                                                                                                                     |

|                       |                                        |                                                                                                                                                                                                                                                                                                                         |
|-----------------------|----------------------------------------|-------------------------------------------------------------------------------------------------------------------------------------------------------------------------------------------------------------------------------------------------------------------------------------------------------------------------|
| Recruitment           | Open vs closed                         | Open                                                                                                                                                                                                                                                                                                                    |
|                       | Contact mode                           | p6.                                                                                                                                                                                                                                                                                                                     |
|                       | Advertising survey                     | p6.                                                                                                                                                                                                                                                                                                                     |
| Survey administration | Web/email                              | Bristol Online Survey (p6)                                                                                                                                                                                                                                                                                              |
|                       | Context                                | Bristol Online Survey (p6)                                                                                                                                                                                                                                                                                              |
|                       | Mandatory/Voluntary                    | Voluntary                                                                                                                                                                                                                                                                                                               |
|                       | Incentives                             | p7. We offered a prize draw.                                                                                                                                                                                                                                                                                            |
| Duplicate entries     | IP check                               | Not used                                                                                                                                                                                                                                                                                                                |
|                       | Log file analysis                      | Detailed on p 7.                                                                                                                                                                                                                                                                                                        |
|                       | Registration                           | Not used                                                                                                                                                                                                                                                                                                                |
| Analysis              | Handling of incomplete questionnaires  | Qs 1, 2, 9 & 10 - Only participants who completed all three questionnaires were included in these analyses (n=36 aligned, n=37 non-aligned).<br><br>Qs 3-8, 11-13: All participants were compared at each time point (n= 139 and n=112 at T1, n=83 and n=96 at T2 for aligned and non-aligned respectively).<br><br>P7. |
|                       | Questionnaires with atypical timestamp | n/a                                                                                                                                                                                                                                                                                                                     |
|                       | Statistical correction                 | none                                                                                                                                                                                                                                                                                                                    |

# BMJ Open

## Newly-qualified doctors' perceived effects of assistantship alignment with first post: A longitudinal questionnaire study

|                                 |                                                                                                                                                                                                                                                                 |
|---------------------------------|-----------------------------------------------------------------------------------------------------------------------------------------------------------------------------------------------------------------------------------------------------------------|
| Journal:                        | <i>BMJ Open</i>                                                                                                                                                                                                                                                 |
| Manuscript ID                   | bmjopen-2018-023992.R1                                                                                                                                                                                                                                          |
| Article Type:                   | Research                                                                                                                                                                                                                                                        |
| Date Submitted by the Author:   | 09-Nov-2018                                                                                                                                                                                                                                                     |
| Complete List of Authors:       | Wells, Stephanie; Cardiff University, School of Medicine<br>Bullock, Alison; Cardiff University, Social Sciences<br>Monrouxe, Lynn V; Taoyuan Chang Gung Memorial Hospital, Chang Gung Medical Education Research Center; CG-MERC, Chang Gung Memorial Hospital |
| <b>Primary Subject Heading</b>: | Medical education and training                                                                                                                                                                                                                                  |
| Secondary Subject Heading:      | Medical education and training                                                                                                                                                                                                                                  |
| Keywords:                       | Workplace learning, Transitions, Students, Medical, Questionnaire, United Kingdom, Education & Training                                                                                                                                                         |
|                                 |                                                                                                                                                                                                                                                                 |

SCHOLARONE™  
Manuscripts

1  
2  
3  
4 **RUNNING HEAD:** Effects of aligning assistantship with first post  
5  
6  
7

8 **Newly-qualified doctors' perceived effects of assistantship**  
9 **alignment with first post: A longitudinal questionnaire study**  
10  
11  
12  
13  
14  
15

16 Dr Stephanie E Wells,<sup>1</sup> Professor Alison Bullock,<sup>2</sup> Professor Lynn V Monrouxe,<sup>3,4</sup>  
17  
18  
19

- 20  
21 1. School of Medicine, Cardiff University, Cardiff, Wales, UK  
22 2. CUREMeDE, Cardiff University, Cardiff, Wales, UK  
23 3. Chang Gung Medical Education Research Centre (CG-MERC), Linkou, Taiwan (R.O.C.)  
24 4. Chang Gung University, Linkou, Taiwan (R.O.C.)  
25  
26  
27  
28  
29  
30  
31

32 Contact details for corresponding author:  
33  
34

35 Lynn Monrouxe

36 Chang Gung Medical Education Research Centre,

37 Chang Gung Memorial Hospital,

38 Guishan District, Taoyuan City, Taiwan.  
39  
40  
41  
42  
43  
44

45 Telephone: +886975367748  
46  
47

48 Email: [monrouxe@me.com](mailto:monrouxe@me.com)  
49  
50

51 **Word count, excluding title pages, abstract, references, figure and tables: 3,365**  
52  
53  
54  
55  
56  
57  
58  
59  
60

## Keywords

Surveys and questionnaires; Identity, Professional; Workplace learning; Transitions; Doctors; Students, Medical; United Kingdom

## Funding Statement

The study was partly funded by a small research grant from the Association of the Study of Medical Education (ASME) and partly by the School of Medicine, Cardiff University who were informed of progress with the collection, analysis, and interpretation of data but the researchers remained fully independent of the funders.

## Competing Interests Statement

We have read and understood BMJ policy on declaration of interests and declare that we have no competing interests.

## Data Sharing Statement

No additional unpublished data are available outside the research team.

## Author Contribution

LVM and AB contributed to the conception of the study; LVM, AB and SEW designed the work; SEW contributed to the acquisition of the data; SEW and LVM contributed to the analysis of the data and all authors contributed to the interpretation of data; SEW and LVM drafted the manuscript, all authors revised the manuscript critically for important intellectual content. All authors gave their final approval of the version to be published; all authors agree to be accountable for all aspects of the manuscript and will ensure that any questions relating to the accuracy or integrity of any part of the manuscript are appropriately investigated and resolved.

## Acknowledgements

The authors wish to thank the wider research team for their involvement in the study design, helping to secure funding ethics approvals and data collection (Mr Michael Stechman, Dr Tom Yapp, Dr Anton Saayman, Dr Steve Riley, Dr Wyn Harris, Dr Lori Black). In addition, the authors thank Ms Nerys Jones and Ms Hannah Perks for their assistance in testing the questionnaire.

## Ethical Approval

School of Medicine Research Ethics Committee at Cardiff University: SMREC Reference Number: 15/08

1  
2  
3  
4  
5  
6  
7  
8  
9  
10  
11  
12  
13  
14  
15  
16  
17  
18  
19  
20  
21  
22  
23  
24  
25  
26  
27  
28  
29  
30  
31  
32  
33  
34  
35  
36  
37  
38  
39  
40  
41  
42  
43  
44  
45  
46  
47  
48  
49  
50  
51  
52  
53  
54  
55  
56  
57  
58  
59  
60

For peer review only

# ABSTRACT

## Purpose

Growing evidence supports the role of student assistantships in enhancing graduates' preparedness for practice. However, there is limited evidence concerning the impact of aligning assistantships with graduates' first doctor post. The aims of our study were to determine newly-qualified doctors' views on the value their assistantship experience, effects on anxiety levels, confidence and preparedness for increased responsibilities, exploring change over time and whether effects differ according to assistantship alignment.

## Design

We conducted a longitudinal cross-sectional online questionnaire study examining experiences of aligned and non-aligned assistantships across the transition from medical student to newly-qualified doctor. The questionnaire was distributed to final year medical students within Wales, UK (n=351) and those commencing their first post in Wales, UK (n=150) in June 2015 at Time 1 (T1), and repeated in September 2015 (one month following transition, T2) and January 2016 (T3).

## Results

Response rates at T1 were 50% (n=251, aligned=139, non-aligned=112), T2 36% (n=179, aligned=83, non-aligned=96) and T3 28% (n=141, aligned=69, non-aligned=72): 15% (n=73, aligned=36, non-aligned=37) completed all questionnaires. Paired longitudinal analysis was undertaken where possible. Significant differences were observed between participants on aligned and non-aligned assistantships in terms of the value they place on their assistantship experiences, their anxiety, confidence levels and preparedness for responsibility.

## Conclusion

Although not sustained, aligned assistantships seem to provide graduates with additional benefits during the August transition. Further work is required to establish what it is about the aligned assistantship programme that works and why.

## Strengths and limitations

1. This is the largest study to date to examine the impact of assistantship alignment on aspects of preparedness for practice.
2. The longitudinal nature of the study enables us to examine the impact of the assistantship programme over time, rather than as a snap-shot in time.
3. Although respondents came from a range of UK medical schools, those experiencing an aligned assistantship were all trained and subsequently worked in a single UK country.
4. This study comprises self-reported measures.



## INTRODUCTION

Evidence suggests that medical students' transition into the clinical workplace can have a negative impact on them in terms of their general anxiety and risk of burnout,(1-3) alongside impacting patient care and safety.(1, 4-10) Thus preparedness for practice is an important focus for medical schools and regulators worldwide.(11-15) The challenges of preparing for practice are clear. Tallentire et al. identified how junior and senior doctors alike recognise the difficulties in translating knowledge into practice; with juniors expressing that they knew *what* to do, but not *how* to do it.(16) Senior doctors attribute this *cognitive gap* to lack of rehearsal. Educational interventions can smooth this gap by increasing graduates' preparedness for *how*. These include student assistantship, shadowing and induction periods.(1, 14) We focus here on student assistantships: "a period during which a student acts as assistant to a junior doctor, with defined duties under appropriate supervision".(14) Assistantship has been a compulsory part of the UK undergraduate curricular since 2011-12. This period of *acting up* occurs during students' final year, but how it is implemented differs across UK educational institutions.(17) For example, different medical schools position it at different times across the curriculum with respect to final exams, at different locations and different durations.(17-23) Often students staying locally are assigned to assistantships posts in the specific hospitals where they will subsequently work.(20) However, few schools offer *aligned* assistantship placements within the specific team into which they will transition.(18, 19)

At the beginning of their assistantship period students tend to report feeling generally competent with their own clinical skills,(20, 23) reflecting the plethora of previous literature in the general area of preparedness.(1) Unsurprisingly, before-after studies tend to see general improvements in graduates' self-reported confidence (or reduced anxiety) around their skills immediately following their assistantship period.(18, 20, 21, 23) By far the most common, robust finding across all studies is the facilitation of teamwork:(1, 17-23) students are seen as team members, thus facilitating their understanding, confidence and a sense of belonging. Students experiencing assistantships unaligned with their first post (e.g. not on the same ward, or same specialty) feel disadvantaged compared to those whose assistantship is fully aligned.(18, 19)

The opportunity within assistantship placements for students to engage in meaningful learning (taking up opportunities for active patient care involvement, increasing

1  
2  
3  
4 responsibility) is also highlighted across the studies.(19, 21) However, opportunities are not  
5 always present or taken up: for example, more missed opportunities can occur in surgical  
6 than during medical placements.(21) Burford et al. (21) believe that this is more to do with  
7 structural or cultural barriers to having 'hands- on' experiences, such as having fewer senior  
8 doctors around to support the juniors, than it is to students' motivation. Despite this,  
9 familiarisation with the workplace environment (i.e. wardcraft) is frequently reported.(18, 19,  
10 23)

11  
12 Research examining both supervisors' and newly-qualified doctors' reports suggests that  
13 supervisors have a more optimistic view than students around graduates' engagement in  
14 learning,(21) and there is variation in supervisor experience (e.g. some supervisors are  
15 reluctant to allow students to undertake routine trainee-doctor procedures).(19, 22) In Jones'  
16 study examining the differences between an aligned and non-aligned model, consultants  
17 openly admitted to emotionally disinvesting in those not staying in their particular placement  
18 (non-aligned model) for their first trainee post as they "will not reap the benefits".(19)

19  
20 Other research has examined the impact that assistantship alignment, gender, professional  
21 identity and anxiety, has on burnout across medical graduates' transition into practice.(24)  
22 Using a longitudinal 1-year cohort study, Monrouxe et al. (2017) administered questionnaires  
23 across four time-points from assistantship to 10 months post graduation. They found that  
24 self-reported anxiety, professional identity and patient-related burnout remained the same  
25 over time, with personal and work-related burnout increasing. Using linear mixed-effect  
26 models, they identified males as having significantly lower personal-burnout but higher  
27 patient-related burnout than females. Additionally, anxiety was significantly associated with  
28 higher burnout, but professional identity was significantly related to lower burnout, over time.  
29 Furthermore, significantly lower personal and work-related burnout over time was found for  
30 those experiencing an aligned assistantship.(25)

31  
32 However, despite the research around assistantships, there is sparse evidence for the  
33 relative effects of assistantship periods and even less around different assistantship  
34 models.(1, 18-23) Much of the research investigating the effects of the assistantship period  
35 utilises a before-after questionnaire format,(20, 21, 23, 25) or initial questionnaire with  
36 follow-up interviews,(18) with none of the analyses matching participant data from Time 1  
37 (T1) and Time 2 (T2). Further, questionnaire content is inconsistent across studies with each  
38 programme having a different duration and configuration, thus limiting comparability.  
39  
40  
41  
42  
43  
44  
45  
46  
47  
48  
49  
50  
51  
52  
53  
54  
55  
56  
57  
58  
59  
60

1  
2  
3 Furthermore, there is a general tendency for relatively low respondent numbers.(18, 21-23)  
4 Taken together this makes it difficult to draw any strong conclusions regarding the effects of  
5 the assistantship period. No one study builds on another.  
6  
7

## 8 9 **Aims**

10 This study aims to address gaps in the literature by building on our previous work examining  
11 the relative value and effects of assistantship alignment with first post and addresses the  
12 following research questions:  
13  
14

15 RQ1: Do newly-qualified doctors value their assistantship experience?  
16  
17

18 RQ1a: Does this differ according to alignment of assistantship with first post?  
19  
20

21 RQ1b: Does this change over time?  
22  
23

24 RQ2: When transitioning jobs in the first post-graduate year, does aligning assistantships  
25 with first post effect newly-qualified doctors in terms of their:  
26  
27

28 RQ2a: Anxiety levels?  
29  
30

31 RQ2b: Confidence levels?  
32  
33

34 RQ2c: Preparedness for the step-change in responsibilities?  
35  
36

37 RQ2c: Does this change over time?  
38  
39

## 40 **METHODS**

41 A longitudinal cross-sectional online questionnaire design was used to assess newly-  
42 qualified doctors' self-reported effects of aligned and non-aligned assistantships across a  
43 single country in the UK.  
44  
45

### 46 **Study setting**

47 The study is set in Wales, UK. The Welsh Deanery (provider of the initial postgraduate  
48 training in Wales) works closely with the two medical schools within the country: a  
49 predominantly school-entry 5-year course (iro 280 graduates annually) and a graduate-entry  
50 medical school (iro 70 graduates annually). Close collaboration between both schools on the  
51 Senior Student Assistantship (SSA: the final placement in Wales), makes this a distinctive  
52 country context within which to examine the impact of the assistantship variables. The SSA  
53  
54  
55  
56  
57  
58  
59  
60

1  
2  
3  
4 commences following students' first post allocations with those remaining in Wales matched  
5 to their first job. Students leaving Wales are allocated an SSA placement in a role similar to  
6 their first job where possible. In 2015, 52% of graduates from Welsh medical schools  
7 (n=182) undertook an aligned SSA. All placements are designed to allow students to learn  
8 generic skills associated with day-to-day, high quality patient management, commensurate  
9 with the General Medical Council's 'Outcomes for Practice' document (13). Students' first  
10 post on graduation begins on the first Wednesday in August. They continue in this post for  
11 four months until the first week in December when they rotate to their second postgraduate  
12 post.  
13  
14  
15  
16  
17  
18  
19

## 20 **Patient and Public Involvement**

21 No patients or public representatives were involved in either the development of the study or  
22 participating in the study.  
23  
24  
25

## 26 **Procedure**

27 Ethical approval for the study was obtained prior to commencement. Final year students at  
28 the two schools in Wales (n=351) and students commencing their first post in Wales (n=150;  
29 from 27 UK medical schools) were invited to complete an online questionnaire at three time  
30 periods: T1 during the SSA in Wales (8th June-6th July 2015), T2 one month after transition  
31 into practice (1st-30th September 2015) and T3 one month after their second post (4th  
32 January-4th February 2016). Thus, only those participants who attended medical school in  
33 Wales, and subsequently began work in Wales, were aligned. However, as we continued to  
34 contact original T1 participants when they left Wales, non-aligned participants comprised  
35 graduates from medical schools within and outwith Wales. All participants graduating from  
36 medical schools outside Wales were non-aligned.  
37  
38  
39  
40  
41  
42  
43  
44  
45

46 At T1, a link was sent via email to students in Wales by medical school administrators, and  
47 to other UK graduates outwith Wales by Foundation School administrators. Participants  
48 were invited to provide an email address if they wished to be entered into a prize draw. With  
49 consent this was used to track responses longitudinally. Only SEW had access to these  
50 identifying data. At T2 and T3, participants were invited by SEW directly if they previously  
51 provided an email address. Additionally, the link was circulated by programme  
52 administrators and posted on targeted social media outlets (e.g. year group Facebook  
53 pages). Postgraduate representatives also raised awareness of the questionnaire.  
54  
55  
56  
57  
58  
59  
60

## Questionnaire development

The T1 questionnaire was developed following discussions with course developers, a group interview with final-year medical students in Wales undertaking assistantships (aligned/non-aligned), junior doctors and consultant supervisors.(19) T1 questionnaire included eight items (Box 1). T2 and T3 questionnaires included two identical questions (Q9 & Q10) as well as two questions included in the T1 questionnaire (Q1 & Q2). Additionally, T2 and T3 questionnaires included questions to suit the postgraduate context (Qs11-14). All three questionnaires included modified versions of the Hamilton Anxiety Rating Scale (HAM-A)(26), the Copenhagen Burnout Inventory (CBI)(27) and Professional Identity, Cognitive Flexibility and Teamworking Scales,(28) reported elsewhere.(25) The entire questionnaire comprised 16 screens including an introduction, three demographic/background screens, a 'your story' screen, a 'prize draw' screen and an ending summary screen. Participants could not move forward without completing each section (apart from the final 'your story' section) although they could navigate backwards through the questionnaire. Responses to all items in Box 1 (the focus of this paper) comprised a 5-point Likert scale (strongly disagree=1, strongly agree=5). IBM SPSS Statistics 20 was used to assist in the analysis. A combination of descriptive statistics, related-sample t-tests and repeated measures ANOVA was performed.

## RESULTS

We begin by reporting participants and response rates for the questionnaire at each time point. We then report the item-by-item analyses for individual questions (over time where appropriate).

### Respondents

At T1 we have 251 respondents (50% response rate; aligned=139, non-aligned=112: Table 1). Longitudinal data from three time-points were available from 73 participants (aligned=36, non-aligned=37). Additionally, some participants completed the questionnaire at two time-points: 131 participants at T1 and T2 (aligned=65, non-aligned=66) and 103 participants (aligned 45, non-aligned= 58) at T2 and T3.

## Individual item analysis: longitudinal data

We first report participants' responses for specific items in the questionnaire, beginning with Qs 1, 2, 9 & 10 as these all have at least two time-points. Only participants who completed all three questionnaires were included in these analyses (n=36 aligned, n=37 non-aligned).

### Q1. "My assistantship was a waste of time" (all time points, reversed scored)

As scores were reversed for this statement, a lower score indicates agreement with the negative statement. There was a significant effect of time,  $F(2,142)=3.15$ ,  $p=.046$ . Pairwise comparison showed that the aligned and non-aligned groups agreed with this question significantly more at T2 than T1 ( $p<.02$ ; mean 4.9 at T1 vs 4.7 at T2; and 4.2 vs 3.9 for aligned and non-aligned participant groups respectively) with no significant differences at T3 (mean 4.7 and 4.1 for aligned and non-aligned participant groups respectively). Those experiencing a non-aligned assistantship agreed more with this statement at all three time-points ( $p<.0001$ : Figure 1).

### Q2. "My anxieties about starting work in my [first /second] junior doctor post were greatly relieved by my assistantship" (all time-points)

The Huynh-Feldt correction was used as sphericity is not assumed. There was a significant effect of time,  $F(1.8,71)=7.18$ ,  $p=.002$  and a significant interaction between time and assistantship alignment,  $F(1.8,71)=4.655$ ,  $p=.01$ : Pairwise comparisons showed that participants experiencing an aligned assistantship reported agreeing with this question significantly more than those on a non-aligned assistantship at T1 (assistantship period) and T2 (first post:  $p<.03$ ), but by T3 (second job) this difference had disappeared (see Figure 2).

### Q9. "My assistantship enhanced my confidence about starting my [second] junior doctor post" (T2 & T3)

There was a significant effect of time,  $F(1,71)=27.0$ ,  $p=.0001$  and interaction between time and assistantship alignment,  $F(1,71)=20.12$ ,  $p=.0001$ : at T2, pairwise comparison showed that participants experiencing an aligned assistantship were significantly more likely to agree that their assistantships had enhanced their confidence about starting in their first post than those experiencing a non-aligned assistantship ( $p<.01$ ; means 4.4 vs 3.5 respectively).

However, at T3 the differences between aligned/non-aligned groups had disappeared (means 3.3 vs 3.4 respectively: Figure 3).

1  
2  
3  
4 Q10. "My assistantship prepared me well for the responsibility of my [second] junior  
5 doctor post" (T2 & T3)  
6  
7

8 There was a significant main effect of time,  $F(1,71)=13.3$ ,  $p=.001$ : both groups reported  
9 feeling less prepared for the responsibility of their second than their first post. Pairwise  
10 comparisons were significant for aligned versus non-aligned assistantship groups:  
11 participants experiencing aligned assistantships reported feeling more prepared than those  
12 experiencing non-aligned assistantships ( $p<.004$ ; means: 4.0 vs 3.2, 3.2 vs 2.9 for aligned  
13 and non-aligned groups at T2 and T3 respectively: Figure 4).  
14  
15  
16  
17  
18

### 19 **Individual item analysis: single time-point items**

20  
21 We also asked questions specific to the time at which the questionnaire was delivered.  
22 Thus, at T1 these questions related to the specific assistantship placement participants (Qs  
23 3-8, Box 1), at T2 these related to participants' reflections on their assistantship and how  
24 well it prepared them for their junior doctor job (Qs 11-13, Box 1). All participants were  
25 compared at each time point ( $n= 139$  and  $n=112$  at T1,  $n=83$  and  $n=96$  at T2 for aligned and  
26 non-aligned respectively: Table 2). Of the nine questions analysed, all but one (Q12) were  
27 significantly different between aligned and non-aligned participant groups: neither group felt  
28 that they could have made more of their assistantship experience. Of the eight that were  
29 significantly different by alignment group, the aligned group rated items significantly higher  
30 than the non-aligned group for seven of these (note, some items were reversed scored as  
31 they were presented in a negative format). Thus, those on aligned assistantships felt: they  
32 were a valuable time for learning from mistakes (Q3); their consultant in their team  
33 understood the purpose of the Assistantship programme (Q4); they were given greater  
34 responsibility (Q5); they learnt a lot about the workplace (Q6); understood the junior doctor  
35 role better (Q7); had valuable experiences in managing critically ill patients (Q8); and  
36 appreciated the value of the assistantship (Q11). However, when considering how well the  
37 assistantship post prepared them for their second junior doctor post (Q13), levels of  
38 agreement were higher amongst the in the non-aligned group .  
39  
40  
41  
42  
43  
44  
45  
46  
47  
48  
49  
50  
51  
52  
53  
54

## 55 **DISCUSSION**

56 Our study adds to the evidence from questionnaire studies concerning the effects of  
57 assistantships as transition interventions.(20, 23, 25) We examined the relative value of  
58  
59  
60

1  
2  
3  
4 aligning assistantship placements with students' first post as newly-qualified doctors across  
5 three time points: during the assistantship placement, one month into their first post and one  
6 month into their second post. Participants responded positively to statements concerning the  
7 impact of their aligned and non-aligned assistantship on their preparedness for practice  
8 across a range of domains. Participants who experienced an aligned assistantship at T1  
9 were consistently more likely to attribute enhanced preparedness for their first junior doctor  
10 role (T2) to their assistantship experiences. Although participants who experienced an  
11 aligned assistantship felt this to be of greater value than those who did not at all time points,  
12 the effects of anxiety relief and enhanced confidence for the aligned group was diminished  
13 at T3. This finding accords with previous research suggesting that an extended shadowing  
14 placement – akin to the aligned assistantship model described here – has the potential to  
15 reduce anxiety associated with the August transition.<sup>(29)</sup> The statistically significant  
16 differences observed between aligned and non-aligned groups' responses to anxiety-related  
17 questions within our data corroborate this idea, but also show the limits of this benefit. It is  
18 important to note that what we are considering here is the issue of context-specific anxiety.  
19 This differs from generalised anxiety as measured by, for example, the Hamilton Anxiety  
20 Scale,<sup>(26)</sup> which has been shown to be a predictor of burnout over this transition period.<sup>(25)</sup>  
21 Interestingly, in these data at T3, participants who had experienced a non-aligned  
22 assistantship believed that their assistantship had prepared them well for their second post  
23 significantly more than those who had experienced an aligned assistantship. However, this  
24 item received the lowest means across all statements for both groups.

25  
26  
27  
28  
29  
30  
31  
32  
33  
34  
35  
36  
37  
38  
39  
40 Taken together, these results suggest the importance of assistantships in general as a  
41 mechanism for supporting the transition of medical graduates into practice, but more  
42 importantly of the added value of aligned assistantships during this time. However, our  
43 results also demonstrate that this added value washes out over time: by the time participants  
44 reach their second transition a few months later, there appears to be little advantage to  
45 having undertaken an aligned assistantship. Indeed, our data suggest that at the point of  
46 rotating to their second post, non-aligned assistantships might convey some advantage;  
47 having started their first junior doctor post without any elongated shadowing period, they  
48 have undertaken this transition before. Ultimately, it appears that, rather than eliminating  
49 anxiety and lack of confidence around the transition into their junior doctor role, the aligned  
50 assistantships merely defers this until a later point. This does not necessarily mean that  
51  
52  
53  
54  
55  
56  
57  
58  
59  
60



1  
2  
3 alignment is unhelpful; rather it means that this is not the end of the story and further  
4 interventions are required over time.  
5  
6

7 This study has a number of strengths and limitations. In terms of strengths, to our  
8 knowledge, this is the first study that has specifically examined the longitudinal impact of  
9 assistantships by analysing matched data, in addition to unpacking the differences between  
10 aligned and non-aligned models of assistantships. Thus, our data permit paired longitudinal  
11 analysis that has served to enhance our understanding of individuals' perception of  
12 assistantship utility and emotional responses to changes in their role at different transition  
13 points during the first junior doctor year. Our data includes the views of graduates from 27  
14 different UK medical schools.  
15  
16

17 Whilst our study allowed for comparisons between students who undertook aligned and non-  
18 aligned assistantships, we recognise limitations. Firstly, the aligned participant cohort is  
19 homogenous in its composition in that they all come from one of two medical schools within  
20 a single country. The study is also limited by attrition in response rates over time: reducing  
21 from n=252 (50% response rate) at Time 1 to n=141 (28% response rate) at Time 3, with  
22 n=73 responding across all three time-points. A number of factors may have contributed to  
23 this. At Times 2 and 3 our ability to contact graduates of Welsh medical schools undertaking  
24 their junior doctor training elsewhere in the UK was not possible unless participants had  
25 provided an email address in a previous questionnaire phase. This problem was  
26 compounded at Time 3; in January, a number of institutional email addresses provided by  
27 participants at Times 1 and 2 had expired if individuals left their institutions. The study is also  
28 subject to responder bias and it is possible that individuals with positive experiences of  
29 aligned assistantships and individuals with negative experiences of non-aligned  
30 assistantships represented the groups most likely to participate. Finally, we have used a  
31 questionnaire response format that is numerical. Given that we have been examining issues  
32 such as anxieties, anxiousness and preparedness for practice, Likert-scale responses can  
33 only provide us with a partial picture of the emotional journey our respondents went through.  
34  
35  
36  
37  
38  
39  
40  
41  
42  
43  
44  
45  
46  
47  
48  
49  
50

51 Despite these limitations, our study suggests that consideration needs to be given to  
52 strategies that support junior doctors as they rotate to their second post. There may be value  
53 in considering the model of practice that was used within the Broad-Based Training  
54 programme which enabled trainees to spend 10% of their time in a forthcoming  
55 specialty.<sup>(30)</sup> Further, although we have found that undertaking an aligned assistantship has  
56  
57  
58  
59  
60

1  
2  
3  
4 positive outcomes, we have yet to fully understand what it feels like for an undergraduate  
5 medical student to transition into practice through these differentially aligned assistantship  
6 programmes. We also are unaware of the specific mechanisms through which the outcomes  
7 we report are achieved, and for whom they are most beneficial. Future research would  
8 benefit from undertaking a range of different studies – including more qualitative studies  
9 examining emotions and how these are managed as well as realist approaches. Such  
10 qualitative data could be analysed in a variety of ways, including specifically examining  
11 emotional talk and strategies around regulating emotions in situ (31, 32). Realist research  
12 delves deeper into the *whys* and *hows* of interventions, unpacking these issues further to  
13 inform programme development (33). We urge future research around the assistantship  
14 programme to move into these realms. In addition, further research should seek to explore  
15 how graduates' experience during their own assistantship influences their behaviour as  
16 assistantship supervisors towards the end of their first year as a newly qualified doctor.  
17  
18  
19  
20  
21  
22  
23  
24  
25  
26  
27  
28  
29  
30  
31  
32  
33  
34  
35  
36  
37  
38  
39  
40  
41  
42  
43  
44  
45  
46  
47  
48  
49  
50  
51  
52  
53  
54  
55  
56  
57  
58  
59  
60

## FIGURES

FIGURE 1: MAIN EFFECT OF VALUE OF ASSISTANTSHIP EXPERIENCE (Q1)

FIGURE 2: INTERACTION BETWEEN ASSISTANTSHIP EXPERIENCE AND ANXIETY RELIEF  
OVER TIME (Q2)

FIGURE 3: INTERACTION BETWEEN ASSISTANTSHIP EXPERIENCE AND CONFIDENCE OVER  
TIME (Q9)

FIGURE 4: MAIN EFFECT OF PREPAREDNESS FOR RESPONSIBILITY AND ASSISTANTSHIP  
EXPERIENCE (Q10)

**BOX 1: QUESTIONNAIRE ITEMS T1-T3****T1 Questionnaire**

Q1. My assistantship has been a waste of time†

Q2. My anxieties about starting work in my first junior doctor post are greatly relieved.

Q3. This has been a valuable time for me to learn from mistakes now, before I have more responsibility

Q4. The consultant in my team does not understand the purpose of the Assistantship programme†

Q5. I have been given more responsibility than ever before

Q6. I have received little in the way of 'learning about the workplace'†

Q7. I understand the job of a junior doctor better now

Q8. I have had no valuable experience in managing critically ill patients (for example, attending cardiac arrest calls)†

**T2 Questionnaire**

Q1. My assistantship was a waste of time†

Q2. My anxieties about starting work in my first junior doctor post were greatly relieved by my Assistantship

Q9. My assistantship enhanced my confidence about starting as a junior doctor

Q10. My assistantship prepared me well for the responsibility of being a junior doctor

Q11. Starting my junior doctor job has made me appreciate the value of my assistantship more

Q12. On reflection, I think I could have made more of my assistantship experience

Q13. My assistantship has prepared me well for the junior doctor post I will move to next

**T3 Questionnaire**

Q1. My assistantship was a waste of time†

1  
2  
3  
4 Q2. My anxieties about starting work in my second junior doctor post were greatly relieved by  
5 my assistantship  
6

7  
8 Q9. My assistantship enhanced my confidence about starting my second junior doctor post  
9

10 Q10. My assistantship prepared me well for the responsibility of my second junior doctor post  
11

12  
13 NOTE: †These questions were reversed scored, so a lower score indicates agreement with the  
14 negative statement.  
15  
16  
17  
18  
19  
20  
21  
22  
23  
24  
25  
26  
27  
28  
29  
30  
31  
32  
33  
34  
35  
36  
37  
38  
39  
40  
41  
42  
43  
44  
45  
46  
47  
48  
49  
50  
51  
52  
53  
54  
55  
56  
57  
58  
59  
60

For peer review only

**TABLE 1: PARTICIPANTS BY ALIGNMENT**

| Questionnaire Phase      |                 | Participants |             |       | Response Rate (%) |
|--------------------------|-----------------|--------------|-------------|-------|-------------------|
|                          |                 | Aligned      | Non-aligned | Total |                   |
| All Questionnaire Data   | T1              | 139          | 112         | 251   | 50                |
|                          | T2              | 83           | 96          | 179   | 36                |
|                          | T3              | 69           | 72          | 141   | 28                |
| Paired Longitudinal Data | T1 and T2       | 65           | 66          | 131   | 26                |
|                          | T2 and T3       | 45           | 58          | 103   | 21                |
|                          | All time points | 36           | 37          | 73    | 15                |

**TABLE 2: INDIVIDUAL ITEM ANALYSES AT TIMES 1 AND 2**

| Statement                                                                                                                | Alignment   | n   | Mean | Std. Dev | Std Error Mean | t      | df  | Sig    |
|--------------------------------------------------------------------------------------------------------------------------|-------------|-----|------|----------|----------------|--------|-----|--------|
| TIME 1                                                                                                                   |             |     |      |          |                |        |     |        |
| Q3. This has been a valuable time for me to learn from mistakes now, before I have more responsibility                   | Aligned     | 139 | 4.37 | 0.684    | 0.058          | 4.614  | 249 | 0.0001 |
|                                                                                                                          | Non-aligned | 112 | 3.93 | 0.846    | 0.846          |        |     |        |
| Q4. The consultant in my team does not understand the purpose of the Assistantship programme†                            | Aligned     | 139 | 4.01 | 0.925    | 0.078          | 2.570* | 233 | 0.011  |
|                                                                                                                          | Non-aligned | 112 | 3.71 | 0.965    | 0.091          |        |     |        |
| Q5. I have been given more responsibility than ever before                                                               | Aligned     | 139 | 3.93 | 1.047    | 0.089          | 3.343* | 214 | 0.001  |
|                                                                                                                          | Non-aligned | 112 | 3.43 | 1.271    | 0.120          |        |     |        |
| Q6. I have received little in the way of 'learning about the workplace'†                                                 | Aligned     | 139 | 4.10 | 0.927    | 0.079          | 2.952  | 249 | 0.003  |
|                                                                                                                          | Non-aligned | 112 | 3.76 | 0.893    | 0.084          |        |     |        |
| Q7. I understand the job of a junior doctor better now                                                                   | Aligned     | 139 | 4.14 | 0.782    | 0.066          | 3.975* | 211 | 0.0001 |
|                                                                                                                          | Non-aligned | 112 | 3.69 | 0.968    | 0.091          |        |     |        |
| Q8. I have had no valuable experience in managing critically ill patients (for example, attending cardiac arrest calls)† | Aligned     | 139 | 3.35 | 1.027    | 0.087          | 2.608* | 220 | 0.010  |
|                                                                                                                          | Non-aligned | 112 | 2.97 | 1.197    | 0.113          |        |     |        |
| TIME 2                                                                                                                   |             |     |      |          |                |        |     |        |

|                                                                                              |             |    |      |       |       |        |     |        |
|----------------------------------------------------------------------------------------------|-------------|----|------|-------|-------|--------|-----|--------|
| Q11. Starting my junior doctor job has made me appreciate the value of my assistantship more | Aligned     | 83 | 4.28 | 0.668 | 0.733 | 7.644* | 162 | 0.0001 |
|                                                                                              | Non-aligned | 96 | 3.27 | 1.071 | 0.109 |        |     |        |
| Q12. On reflection, I think I could have made more of my assistantship experience            | Aligned     | 83 | 2.80 | 1.124 | 0.123 | -0.559 | 177 | 0.577  |
|                                                                                              | Non-aligned | 96 | 2.89 | 1.035 | 0.106 |        |     |        |
| Q13. My assistantship has prepared me well for the junior doctor post I will move to next    | Aligned     | 83 | 2.46 | 0.991 | 0.109 | -2.997 | 177 | 0.003  |
|                                                                                              | Non-aligned | 96 | 2.93 | 1.088 | 0.111 |        |     |        |

NOTE: †Questions marked were reverse scored, so a lower score indicates agreement with the negative statement; \*Equal variances not assumed.



## REFERENCES

1. Monrouxe LV, Bullock A, Gormley G, et al New graduate doctors' preparedness for practice: a multistakeholder, multicentre narrative study *BMJ Open* 2018;8:e023146. doi: 10.1136/bmjopen-2018-023146
2. Markwell AL, Wainer Z. The health and wellbeing of junior doctors: insights from a national survey. *Medical Journal of Australia*. 2009;191(8):441-4.
3. O'Donnell M, Noad R, Boohan M, Carragher A. Foundation programme impact on junior doctor personality and anxiety in Northern Ireland. *The Ulster Medical Journal*. 2012;81(1):19-25.
4. Vaughan L, McAlister G, Bell D. 'August is always a nightmare': results of the Royal College of Physicians of Edinburgh and Society of Acute Medicine August transition survey. *Clinical medicine (London, England)*. 2011;11(4):322-6.
5. Young JQ, Ranji SR, Wachter RM, Lee CM, Niehaus B, Auerbach AD. "July Effect": Impact of the Academic Year-End Changeover on Patient Outcomes. *Annals of Internal Medicine*. 2011;155(5):309-15.
6. Inaba K, Recinos G, Teixeira PG, Barmparas G, Talving P, Salim A, et al. Complications and death at the start of the new academic year: is there a July phenomenon? *The Journal of trauma*. 2010;68(1):19-22.
7. Phillips DP, Barker GE. A July spike in fatal medication errors: a possible effect of new medical residents. *Journal of general internal medicine*. 2010;25(8):774-9.
8. Yaghoubian A, de Virgilio C, Chiu V, Lee SL. "July effect" and appendicitis. *Journal of surgical education*. 2010;67(3):157-60.
9. Massey N. Black Wednesday' expected to see rise in hospital patient deaths as junior doctors start work. *The Mirror*. 2014.
10. Alexander C, Millar J, Szmidt N, Hanlon K, Cleland J. Can new doctors be prepared for practice? A review. *Clin Teach*. 2014;11(3):188-92.
11. Langdale LA, Schaad D, Wipf J, Marshall S, Vontver L, Scott CS. Preparing graduates for the first year of residency: are medical schools meeting the need? *Academic medicine : journal of the Association of American Medical Colleges*. 2003;78(1):39-44.
12. Tokuda Y, Goto E, Otaki J, Jacobs J, Omata F, Obara H, et al. Undergraduate educational environment, perceived preparedness for postgraduate clinical training, and pass rate on the National Medical Licensure Examination in Japan. *BMC medical education*. 2010;10:35.
13. General Medical Council. *Tomorrow's Doctors: Outcomes and standards for undergraduate medical education*. London: General Medical Council; 2009.

- 1  
2  
3 14. GMC. Clinical placements for medical students: Advice supplementary to Tomorrow's  
4 Doctors (2009). London: General Medical Council; 2011.
- 5  
6 15. GMC. Promoting excellence: standards for medical education and training  
7 [http://www.gmc-](http://www.gmc-uk.org/Promoting_excellence_standards_for_medical_education_and_training_0715.pdf_61939165.pdf)  
8 [uk.org/Promoting\\_excellence\\_standards\\_for\\_medical\\_education\\_and\\_training\\_0715.pdf\\_619](http://www.gmc-uk.org/Promoting_excellence_standards_for_medical_education_and_training_0715.pdf_61939165.pdf)  
9 [39165.pdf](http://www.gmc-uk.org/Promoting_excellence_standards_for_medical_education_and_training_0715.pdf_61939165.pdf): General Medical Council; 2015 [
- 10  
11 16. Tallentire VR, Smith SE, Skinner J, Cameron HS. Understanding the behaviour of  
12 newly qualified doctors in acute care contexts. *Med Educ*. 2011;45(10):995-1005.
- 13  
14 17. Crossley JG, Vivekananda-Schmidt P. Student assistantships: bridging the gap  
15 between student and doctor. *Journal of Advances in Medical Education and Practice*.  
16 2015;6:447-57.
- 17  
18 18. Lightman E, Kingdon S, Nelson M. A prolonged assistantship for final-year students.  
19 *The Clinical Teacher*. 2015;12(2):115-20.
- 20  
21 19. Jones, O. M., Okeke, C., Bullock, A., Wells, S. E. & Monrouxe, L. V. 'He's going to be  
22 a doctor in August': a narrative interview study of medical students' and their educators'  
23 experiences of aligned and misaligned assistantships. *BMJ Open*,  
24 2016;6:e011817. doi: 10.1136/bmjopen-2016-011817
- 25  
26 20. Braniff C, Spence RA, Stevenson M, Boohan M, Watson P. Assistantship improves  
27 medical students' perception of their preparedness for starting work. *Medical Teacher*.  
28 2016;38(1):51-8.
- 29  
30 21. Burford B, Ellis E, Williamson A, Forest I, Vance G. Learning opportunities in 'student  
31 assistantships'. *The Clinical Teacher*. 2015;12(2):121-7.
- 32  
33 22. Fullbrook A, Ross M, Mellanby E, Wylde K, Jaap A, Cameron H. Initial experiences  
34 of a student assistantship. *The Clinical Teacher*. 2015.
- 35  
36 23. Hawkins A, Stanton A, Forbes K. An extended assistantship for final-year students.  
37 *The Clinical Teacher*. 2015.
- 38  
39 24. Monrouxe, L. V., Bullock, A., Tseng, H. & Wells, S. E. Association of professional  
40 identity, gender, team understanding, anxiety and workplace learning alignment with burnout  
41 in junior doctors: a longitudinal cohort study. *BMJ Open*, 2017;7:e017942. doi:  
42 10.1136/bmjopen-2017-017942
- 43  
44 25. Monrouxe, L. V., Grundy, L., Mann, M., John, Z., Panagoulas, E., Bullock, A. &  
45 Mattick, K. How prepared are UK medical graduates for practice? A rapid review of the  
46 literature 2009–2014. *BMJ Open*, 2017; 7:e013656. doi: 10.1136/bmjopen-2016-013656
- 47  
48 26. Hamilton M. The assessment of anxiety states by rating. *British Journal of Medical*  
49 *Psychology*. 1959;32:50-5.
- 50  
51  
52  
53  
54  
55  
56  
57  
58  
59  
60

- 1  
2  
3  
4 27. Kristensen TS, Borritz M, Villadsen E, Christensen KB. The Copenhagen Burnout  
5 Inventory: A new tool for the assessment of burnout, . *Work & Stress: An International*  
6 *Journal of Work, Health & Organisations*. 2005;19(3):192-207.  
7  
8 28. Adams K, Hean S, Sturges P, Macleod Clark J. Investigating the factors influencing  
9 professional identity of first-year health and social care students. *Learning in Health and*  
10 *Social Care*. 2006;5(2):55-68.  
11  
12 29. Van Hamel C, Jenner LE. Prepared for practice? A national survey of UK foundation  
13 doctors and their supervisors. *Med Teach*. 2015;37(2):181-8.  
14  
15 30. Muddiman E, Bullock AD, MacDonald J, Allery L, Webb KL, Pugsley L. 'It's surprising  
16 how differently they treat you': a qualitative analysis of trainee reflections on a new  
17 programme for generalist doctors. *BMJ Open*. 2016;6(9).  
18  
19 31. Lundin, R.M., Bashir, K., Bullock, A. et al. "I'd been like freaking out the whole night":  
20 exploring emotion regulation based on junior doctors' narratives. *Adv in Health Sci Educ*  
21 (2018) 23: 7. <https://doi.org/10.1007/s10459-017-9769-y>  
22  
23 32. Monrouxe, L.V. & Rees, C.E. "It's just a clash of cultures": emotional talk within  
24 medical students' narratives of professionalism dilemmas. *Adv in Health Sci Educ* (2012) 17:  
25 671. <https://doi.org/10.1007/s10459-011-9342-z>  
26  
27 33. Kehoe, A. , McLachlan, J. , Metcalf, J. , Forrest, S. , Carter, M. and Illing, J. (2016),  
28 Supporting international medical graduates' transition to their host-country: realist synthesis.  
29 *Med Educ*, 50: 1015-1032. doi:10.1111/medu.13071  
30  
31  
32  
33  
34  
35  
36  
37  
38  
39  
40  
41  
42  
43  
44  
45  
46  
47  
48  
49  
50  
51  
52  
53  
54  
55  
56  
57  
58  
59  
60

1  
2  
3  
4  
5  
6  
7  
8  
9  
10  
11  
12  
13  
14  
15  
16  
17  
18  
19  
20  
21  
22  
23  
24  
25  
26  
27  
28  
29  
30  
31  
32  
33  
34  
35  
36  
37  
38  
39  
40  
41  
42  
43  
44  
45  
46  
47  
48  
49  
50  
51  
52  
53  
54  
55  
56  
57  
58  
59  
60

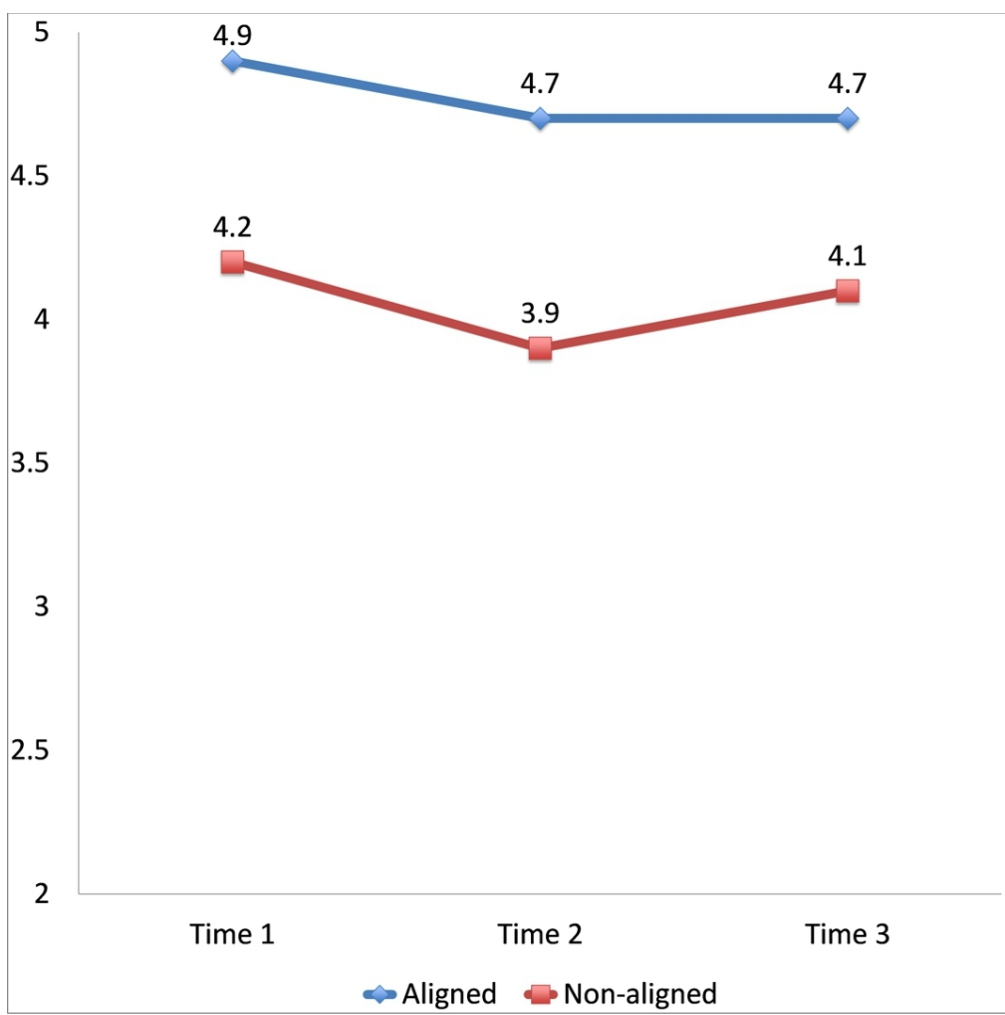

Figure 1: Main effect of value of assistantship experience

90x90mm (300 x 300 DPI)

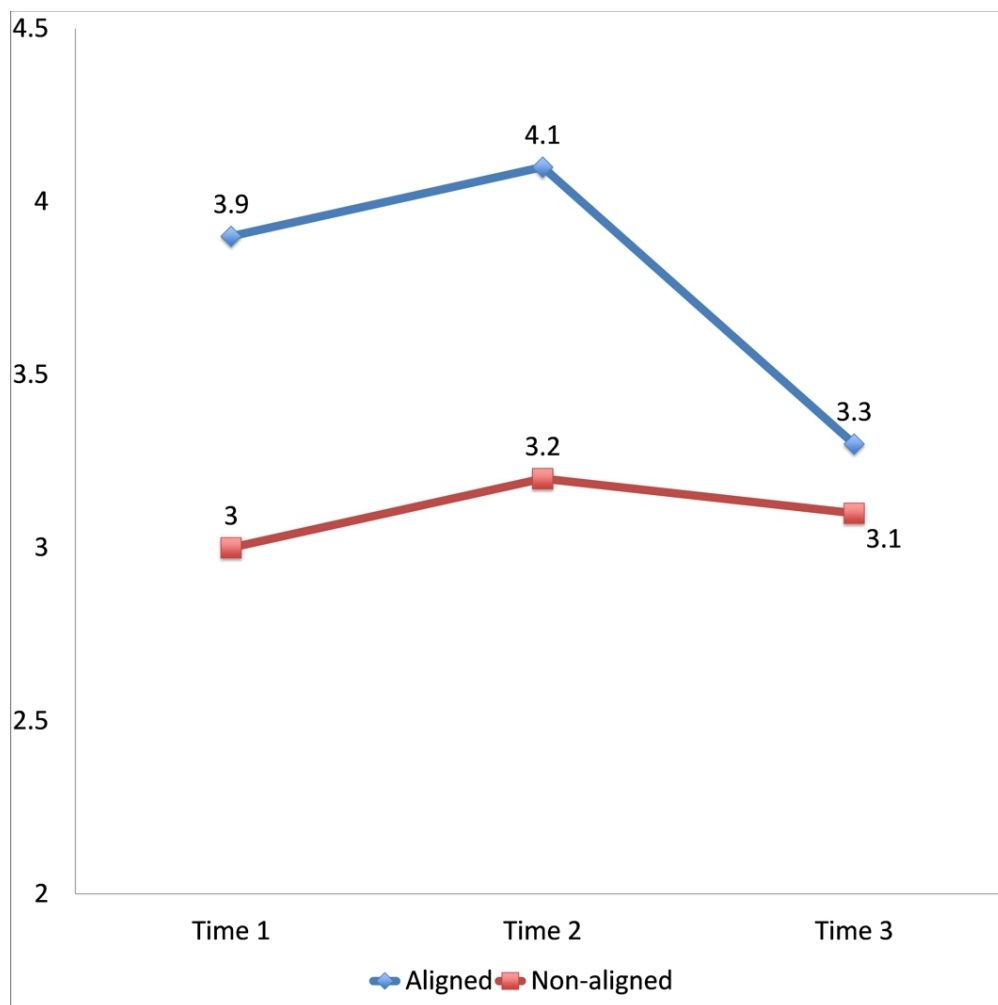

Figure 2: Interaction between assistantship experience and anxiety over time

90x90mm (300 x 300 DPI)

1  
2  
3  
4  
5  
6  
7  
8  
9  
10  
11  
12  
13  
14  
15  
16  
17  
18  
19  
20  
21  
22  
23  
24  
25  
26  
27  
28  
29  
30  
31  
32  
33  
34  
35  
36  
37  
38  
39  
40  
41  
42  
43  
44  
45  
46  
47  
48  
49  
50  
51  
52  
53  
54  
55  
56  
57  
58  
59  
60

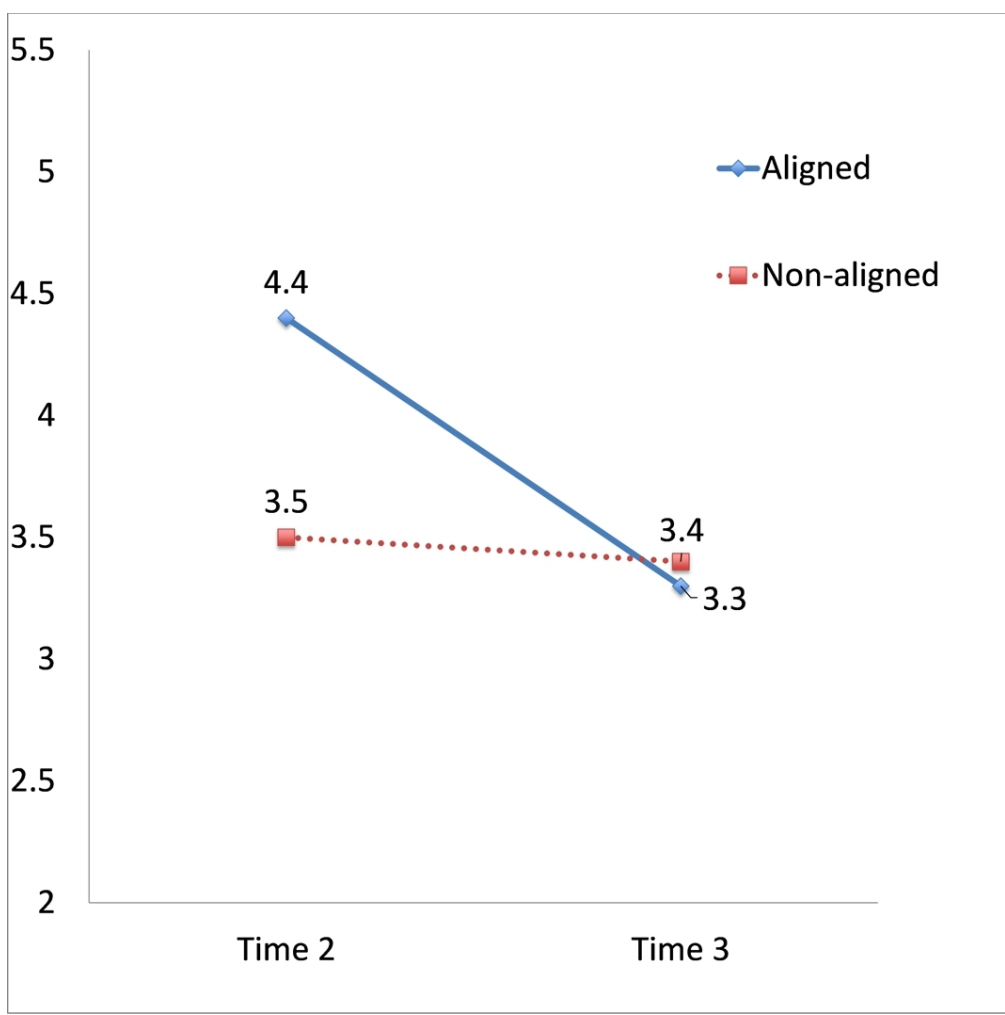

Figure 3: Interaction between assistantship experience and confidence over time  
90x90mm (300 x 300 DPI)

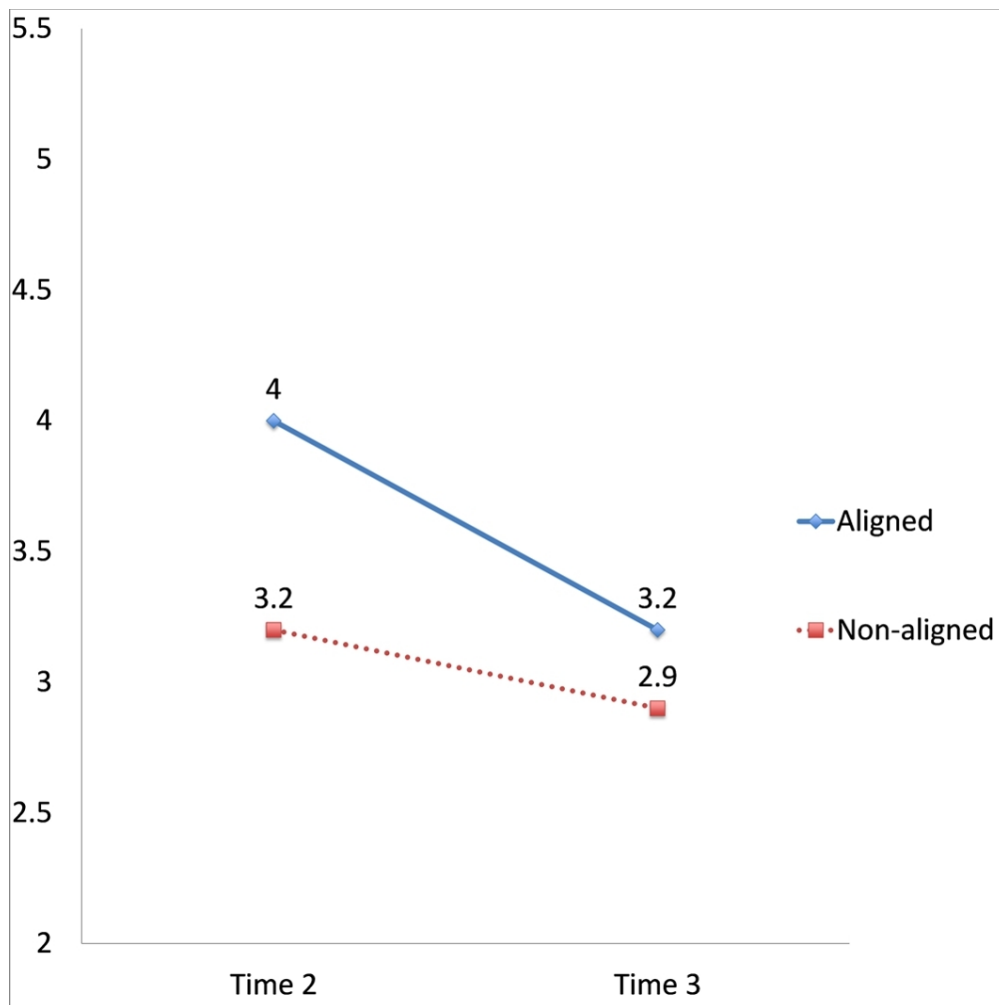

Figure 4: Main effect of preparedness for responsibility and assistantship experience

90x90mm (300 x 300 DPI)

## Checklist for Reporting Results of Internet E-Surveys (CHERRIES)

|                                                    |                        |                                                                                                                                                                                                                                                                                                                                                                                                                             |
|----------------------------------------------------|------------------------|-----------------------------------------------------------------------------------------------------------------------------------------------------------------------------------------------------------------------------------------------------------------------------------------------------------------------------------------------------------------------------------------------------------------------------|
|                                                    | Date/Time              | Procedure, p6.                                                                                                                                                                                                                                                                                                                                                                                                              |
|                                                    | Randomization of items | None                                                                                                                                                                                                                                                                                                                                                                                                                        |
|                                                    | Adaptive questioning   | None                                                                                                                                                                                                                                                                                                                                                                                                                        |
|                                                    | Number of screens      | 16, see p6.                                                                                                                                                                                                                                                                                                                                                                                                                 |
|                                                    | Completeness check     | Participants could not move forward without completing sections (apart from the final 'your story' section). P6.                                                                                                                                                                                                                                                                                                            |
|                                                    | Review check           | Yes, participants could move backwards. P6.                                                                                                                                                                                                                                                                                                                                                                                 |
| Response rates                                     | Unique site visitor    | Via email address which enabled us to link data longitudinally. P6.                                                                                                                                                                                                                                                                                                                                                         |
|                                                    | View rates             | None recorded                                                                                                                                                                                                                                                                                                                                                                                                               |
|                                                    | Participation rate     | "At T1 we have 251 respondents (50% response rate; aligned=139, non-aligned=112: Table 1). Longitudinal data from three time-points were available from 73 participants (aligned=36, non-aligned=37). Additionally, some participants completed the questionnaire at two time-points: 131 participants at T1 and T2 (aligned=65, non-aligned=66) and 103 participants (aligned 45, non-aligned= 58) at T2 and T3."<br>P6-7. |
|                                                    | Completion rate        | Attrition was not recorded                                                                                                                                                                                                                                                                                                                                                                                                  |
| Preventing multiple entries from single individual | Cookies used           | Respondent anonymity and Bristol Online Survey (BOS). BOS is designed to protect respondent anonymity. BOS does not use cookies for survey completion and external tracking software such as Google Analytics is not supported on BOS surveys. Additionally, we cannot access any information about respondents' IP addresses.                                                                                              |
| Design                                             | Describe survey design | p6.                                                                                                                                                                                                                                                                                                                                                                                                                         |
| IRB review                                         | IRB approval           | Yes, detailed                                                                                                                                                                                                                                                                                                                                                                                                               |
|                                                    | Informed consent       | Yes, including additional 1 page information on the survey itself.                                                                                                                                                                                                                                                                                                                                                          |
|                                                    | Data protection        | BOS Security<br>Physical security<br><br>All data is stored on servers located at the University of Bristol, United Kingdom.<br><br>Administrative security<br><br>Access to sensitive data via BOS is strictly                                                                                                                                                                                                             |



|  |  |                                                                                                                                                                                                                                                                                                                                                                                                                                                                                                                                                                                                                                                                                                                                                                                                                                                                                                                                                                                                                                                                                                                                                                                                                                                                                                                                                                                                                                                                                                                                                                                                                                                                   |
|--|--|-------------------------------------------------------------------------------------------------------------------------------------------------------------------------------------------------------------------------------------------------------------------------------------------------------------------------------------------------------------------------------------------------------------------------------------------------------------------------------------------------------------------------------------------------------------------------------------------------------------------------------------------------------------------------------------------------------------------------------------------------------------------------------------------------------------------------------------------------------------------------------------------------------------------------------------------------------------------------------------------------------------------------------------------------------------------------------------------------------------------------------------------------------------------------------------------------------------------------------------------------------------------------------------------------------------------------------------------------------------------------------------------------------------------------------------------------------------------------------------------------------------------------------------------------------------------------------------------------------------------------------------------------------------------|
|  |  | <p>limited to BOS's support and technical teams. This access is only permitted when it is at the request of the client concerned or necessary for the investigation of operational issues (or when required by law).</p> <p>The BOS servers and backups are accessible only by members of the BOS technical team and other authorised members of IT Services within the University of Bristol (such as systems administrators or those responsible for maintaining the backup service).</p> <p>User authentication</p> <p>New users choose their own passwords and will need to enter a username and password each time they log in. BOS issues a cookie to store session information when registered users log in. The session cookie does not include user information and is not retained once the browser is closed.</p> <p>No cookies are used when survey respondents complete surveys.</p> <p>BOS employees</p> <p>All new staff at the University of Bristol, including casual staff, are given a contract of employment containing a confidentiality clause and are made aware of their responsibilities toward restricted university data and personal data as part of their induction process. All University of Bristol IT staff are provided with data security training.</p> <p>Encryption</p> <p>All survey responses are collected over encrypted SSL (TLS) connections. SSL is the standard technology for establishing an encrypted link between a web server and a browser. It ensures that sensitive information can be transmitted securely. All communications within onlinesurveys.ac.uk are also sent over SSL encrypted connections.</p> |
|--|--|-------------------------------------------------------------------------------------------------------------------------------------------------------------------------------------------------------------------------------------------------------------------------------------------------------------------------------------------------------------------------------------------------------------------------------------------------------------------------------------------------------------------------------------------------------------------------------------------------------------------------------------------------------------------------------------------------------------------------------------------------------------------------------------------------------------------------------------------------------------------------------------------------------------------------------------------------------------------------------------------------------------------------------------------------------------------------------------------------------------------------------------------------------------------------------------------------------------------------------------------------------------------------------------------------------------------------------------------------------------------------------------------------------------------------------------------------------------------------------------------------------------------------------------------------------------------------------------------------------------------------------------------------------------------|

|                         |  |                                                                                                                                                                                                                                                                                                                                                                                                                                                                                                                                                                                                                                                                                                                                                                                                                                                                                                                                                                                                                                                                                                                                                                                                                                                                                                                                                                                                                                                                                                                                                             |
|-------------------------|--|-------------------------------------------------------------------------------------------------------------------------------------------------------------------------------------------------------------------------------------------------------------------------------------------------------------------------------------------------------------------------------------------------------------------------------------------------------------------------------------------------------------------------------------------------------------------------------------------------------------------------------------------------------------------------------------------------------------------------------------------------------------------------------------------------------------------------------------------------------------------------------------------------------------------------------------------------------------------------------------------------------------------------------------------------------------------------------------------------------------------------------------------------------------------------------------------------------------------------------------------------------------------------------------------------------------------------------------------------------------------------------------------------------------------------------------------------------------------------------------------------------------------------------------------------------------|
|                         |  | <p>BOS user passwords are encrypted using PBKDF2 with a SHA256 hash and a random salt.</p> <p>Backups</p> <p>BOS's data stores are backed up daily.</p> <p>University of Bristol has a data retention policy that means that backups are only held for three months. Backups are stored securely in a separate location from the data centres, but still on the University of Bristol's campus. After three months the tapes are either recycled or destroyed. BOS enables users to export survey response data in a number of popular formats (see FAQ for details) so that it can be backed up or used with other software.</p> <p>User responsibilities</p> <p>Users must not share accounts – by this we mean that each person who has access to a BOS account must use a unique username and password. You must not allow other people to use your username and password and multiple users must not log in using a single set of shared credentials (such as a 'group account').</p> <p>Users' passwords should be sufficiently complicated, stored securely (if stored at all) and not be the same as used on any other system.</p> <p>You should ensure that you have appropriate levels of security on your own systems should you choose to export sensitive data.</p> <p>You and/or your institution are the Data Controller for any information collected using surveys run through BOS. If you are not sure of the implications of being a Data Controller please consult the data protection officer (or equivalent) at your institution.</p> |
| Development and testing |  | Questionnaire was tested by undergraduate volunteers prior to the launch (see Acknowledgements) and p6.                                                                                                                                                                                                                                                                                                                                                                                                                                                                                                                                                                                                                                                                                                                                                                                                                                                                                                                                                                                                                                                                                                                                                                                                                                                                                                                                                                                                                                                     |

|                       |                                        |                                                                                                                                                                                                                                                                                                                         |
|-----------------------|----------------------------------------|-------------------------------------------------------------------------------------------------------------------------------------------------------------------------------------------------------------------------------------------------------------------------------------------------------------------------|
| Recruitment           | Open vs closed                         | Open                                                                                                                                                                                                                                                                                                                    |
|                       | Contact mode                           | p6.                                                                                                                                                                                                                                                                                                                     |
|                       | Advertising survey                     | p6.                                                                                                                                                                                                                                                                                                                     |
| Survey administration | Web/email                              | Bristol Online Survey (p6)                                                                                                                                                                                                                                                                                              |
|                       | Context                                | Bristol Online Survey (p6)                                                                                                                                                                                                                                                                                              |
|                       | Mandatory/Voluntary                    | Voluntary                                                                                                                                                                                                                                                                                                               |
|                       | Incentives                             | p7. We offered a prize draw.                                                                                                                                                                                                                                                                                            |
| Duplicate entries     | IP check                               | Not used                                                                                                                                                                                                                                                                                                                |
|                       | Log file analysis                      | Detailed on p 7.                                                                                                                                                                                                                                                                                                        |
|                       | Registration                           | Not used                                                                                                                                                                                                                                                                                                                |
| Analysis              | Handling of incomplete questionnaires  | Qs 1, 2, 9 & 10 - Only participants who completed all three questionnaires were included in these analyses (n=36 aligned, n=37 non-aligned).<br><br>Qs 3-8, 11-13: All participants were compared at each time point (n= 139 and n=112 at T1, n=83 and n=96 at T2 for aligned and non-aligned respectively).<br><br>P7. |
|                       | Questionnaires with atypical timestamp | n/a                                                                                                                                                                                                                                                                                                                     |
|                       | Statistical correction                 | none                                                                                                                                                                                                                                                                                                                    |
